1       **Midkine in chick and mouse retinas: neuroprotection, glial reactivity and the**  
2                               **formation of Müller glia-derived progenitor cells**

3  
4  
5                   Warren A. Campbell<sup>1</sup>, Amanda Fritsch-Kelleher<sup>1</sup>, Isabella Palazzo<sup>1</sup>,  
6                   Thanh Hoang<sup>2</sup>, Seth Blackshaw<sup>2</sup>, Andy J. Fischer<sup>1\*</sup>

7  
8  
9   1 Department of Neuroscience, College of Medicine, The Ohio State University,  
10 Columbus, OH

11   2 Solomon H. Snyder Department of Neuroscience, Johns Hopkins University School of  
12 Medicine, Baltimore, MD

13  
14 **\*corresponding author:** Andy J. Fischer, Department of Neuroscience, Ohio State  
15 University, College of Medicine, 3020 Graves Hall, 333 W. 10<sup>th</sup> Ave, Columbus, OH  
16 43210-1239, USA. Telephone: (614) 292-3524; Fax: (614) 688-8742; email:  
17 [Andrew.Fischer@osumc.edu](mailto:Andrew.Fischer@osumc.edu)

18  
19 **Abbreviated title:** Midkine in Müller glia and Müller glia-derived progenitor cells

20  
21 **Number of pages:** 69   **Number of Figures:** 12   **Number of Supplemental Figures:** 6  
22 **Number of Tables:** 2

23  
24 **Author Contributions:** WAC, AF-K and IP designed and executed experiments,  
25 gathered data, constructed figures and contributed to writing the manuscript. TH and SB  
26 executed experiments, and gathered data. AJF designed experiments, analyzed data,  
27 constructed figures and wrote the manuscript.

28  
29  
30 **Acknowledgements:** This work was supported by RO1 EY022030-08 (AJF) and UO1  
31 EY027267-04 (SB, AJF).

34 **Abstract**

35           Recent studies have shown that midkine (MDK), a basic heparin-binding growth  
36 factor, is involved in the development and regeneration of the zebrafish retina. However,  
37 very little is known about MDK in the retinas of warm-blooded vertebrates. We  
38 investigate the expression patterns of MDK and related factors, roles in neuronal  
39 survival, and influence upon the formation of Müller glia-derived progenitor cells  
40 (MGPCs) in chick and mouse model systems. By using single-cell RNA-sequencing  
41 (scRNA-seq), we find that *MDK* and related factors are dynamically expressed by  
42 maturing MG and by MG in retinas damaged by NMDA or treated with insulin and  
43 FGF2. Interestingly, *MDK* is significantly up-regulated by MG in damaged chick retinas,  
44 but down-regulated by MG in damaged mouse retinas. In both chick and mouse retinas,  
45 exogenous MDK selectively up-regulates cFOS and pS6 (a readout of mTOR-signaling)  
46 in Müller glia. In the chick, intraocular injections of MDK before injury decrease numbers  
47 of dying cells, decrease microglial reactivity, decrease the accumulation of Non-  
48 astrocytic Inner Retinal Glial (NIRG) cells, and decrease numbers of proliferating  
49 MGPCs. Addition of MDK signaling inhibitor Na<sub>3</sub>VO<sub>4</sub> following retinal injury reverses  
50 these effects to increase the number of dying cells, accumulation of NIRG cells, and  
51 decrease the number of proliferating MGPCs. Inhibitors of PP2A and Pak1 had specific  
52 inhibitory effects on MGPC formation. In mice, MDK administration with NMDA damage  
53 drives a small but significant increase in MGPCs. We conclude that *MDK* expression is  
54 dynamically regulated in reactive Müller glia and during reprogramming into MGPCs.  
55 MDK acts to coordinate glial activity, neuronal survival, and may act in an autocrine  
56 manner to influence the re-programming of Müller glia into proliferating MGPCs.

57

## 58 Introduction

59 Midkine (MDK) and pleiotrophin (PTN) are secreted factors that belong to a  
60 family of basic heparin-binding cytokines (Muramatsu, 2002). The C-terminal domain of  
61 MDK interacts with carbohydrate-binding proteins which facilitate dimerization and cell  
62 signaling (Fabri et al., 1993; Iwasaki et al., 1997; Kilpeläinen et al., 2000; Tsutsui et al.,  
63 1991). Extracellular matrix proteoglycans that have a high binding-affinity for MDK  
64 include protein tyrosine phosphatase- $\zeta$  receptor-like 1 (PTPRZ1), syndecans, glypican-  
65 2, PG-M/versican, integrin  $\alpha_6\beta_1$ , low density lipoprotein receptor-related protein (LRP),  
66 and neuroglycans (Ichihara-Tanaka et al., 2006; Kojima et al., 1996; Kurosawa et al.,  
67 2001; Maeda et al., 1999; Mitsiadis et al., 1995; Muramatsu et al., 2000; Muramatsu et  
68 al., 2004; Nakanishi et al., 1997; Zou et al., 2000). MDK forms a complex with these  
69 proteoglycans to initiate cell-signaling through receptor tyrosine kinases and activation  
70 of second messengers such as src, PI-3K, and PAK1 (Qi et al., 2001; Shen et al., 2015;  
71 Thillai et al., 2016).

72 During development the roles of MDK are conserved across many vertebrate  
73 species including fish, mice, and humans (Tsutsui et al., 1991). MDK has different  
74 functions including promoting cell survival and the proliferation of stem cells, acting  
75 directly on stem cells during normal fetal development and organogenesis (Mitsiadis et  
76 al., 1995). MDK has been implicated in the pathogenesis of more than 20 different types  
77 of cancers, resistance to chemotherapeutics, increased survival of cancerous cells with  
78 acidosis and hypoxia, and elevated levels of MDK have been correlated with poor  
79 prognoses (Dai et al., 2009; Kang et al., 2004; Mashima et al., 2009; Mirkin et al., 2005;  
80 Reynolds et al., 2004; Salama et al., 2006; Takei et al., 2001; Takei et al., 2006; Tsutsui  
81 et al., 1993). In damaged mammalian CNS, MDK expression is elevated and may  
82 support neuronal survival (Jochheim-Richter et al., 2006; Kikuchi-Horie et al., 2004;  
83 Miyashiro et al., 1998; Obama et al., 1998; Sakakima et al., 2006). In rodent eyes,  
84 subretinal delivery of MDK protects photoreceptors from light-mediated degeneration  
85 (Unoki et al., 1994). In sum, MDK has pleiotropic functions that are context-dependent.

86 In fish, retinal regeneration is a robust process that restores neurons and visual  
87 function following damage, whereas this process is far less robust in birds and nearly  
88 absent in mammals (Hitchcock and Raymond, 1992; Karl et al., 2008a; Raymond,

89 1991). Müller glia (MG) have been identified as the cell-of-origin for progenitors in  
90 mature retinas (Bernardos et al., 2007; Fausett and Goldman, 2006; Fausett et al.,  
91 2008; Fischer and Reh, 2001; Ooto et al., 2004). In mammalian retina, significant  
92 stimulation, such as forced expression of *Ascl1*, inhibition of histone deacetylases and  
93 neuronal damage, is required to reprogram MG into progenitor-like cells (Karl et al.,  
94 2008a; Pollak et al., 2013, 1; Ueki et al., 2015). In the chick retina, MG readily  
95 reprogram into progenitor-like cells that proliferate, but the progeny have a limited  
96 capacity to differentiate as neurons (Fischer and Reh, 2001; Fischer and Reh, 2003).  
97 Understanding the mechanisms that regulate the proliferation and differentiation of  
98 MGPCs is important to harnessing the regenerative potential of MG in warm-blooded  
99 vertebrates.

100         Recent studies in zebrafish retina have indicated that MDK-a and MDK-b are up-  
101 regulated in stem niches and in MG during reprogramming (Calinescu et al., 2009).  
102 MDK-a is expressed by mitotic retinal progenitors at 30 hrs post-fertilization, then in MG  
103 at 72 hrs post-fertilization through adulthood (Gramage et al., 2014). Knock-down of  
104 MDK-b results in microphthalmia or anophthalmia (Calinescu et al., 2009). During  
105 reprogramming of MG into MGPCs following retinal damage, MDK-a controls cell cycle  
106 exit and neuronal differentiation via bHLH transcription factor *Id2a* (Luo et al., 2012;  
107 Nagashima et al., 2019). Nothing is known about how MDK influences the process of  
108 retinal regeneration in warm-blooded vertebrates. Accordingly, we investigate  
109 expression patterns and the impact of MDK on glial cells in the chick and mouse retinas  
110 *in vivo*.

111

## 112 **Methods and Materials:**

### 113 *Animals:*

114         The animals approved for use in these experiments was in accordance with the  
115 guidelines established by the National Institutes of Health and IACUC at The Ohio State  
116 University. Newly hatched P0 wildtype leghorn chicks (*Gallus gallus domesticus*) were  
117 obtained from Meyer Hatchery (Polk, Ohio). Post-hatch chicks were maintained in a  
118 regular diurnal cycle of 12 hours light, 12 hours dark (8:00 AM-8:00 PM). Chicks were  
119 housed in stainless-steel brooders at 25°C and received water and Purina™ chick

120 starter *ad libitum*. Mice were kept on a cycle of 12 h light, 12 h dark (lights on at  
121 6:00 AM). C57BL/6J mice between the ages of P60-P100 were used for all experiments.

122 Fertilized eggs were obtained from the Michigan State University, Department of  
123 Animal Science. Eggs were incubated at a constant 37.5°C, with a 1hr period room  
124 temperature cool down every 24hrs. Additionally, the eggs were rocked every 45  
125 minutes, and held at a constant relative humidity of 45%. Embryos were harvested at  
126 various time points after incubation and staged according to guidelines established by  
127 Hamburger and Hamilton (1951).

128

#### 129 *Intraocular injections:*

130 Chicks were anesthetized with 2.5% isoflurane mixed with oxygen from a non-  
131 rebreathing vaporizer. The technical procedures for intraocular injections were  
132 performed as previously described (Fischer et al., 1998). With all injection paradigms,  
133 both pharmacological and vehicle treatments were administered to the right and left eye  
134 respectively. Compounds were injected in 20  $\mu$ l sterile saline with 0.05 mg/ml bovine  
135 serum albumin added as a carrier. For mice injections, the total volume injected into  
136 each eye was 2 $\mu$ l. The details of compounds injected in to the vitreous are described  
137 (Table S1)

138

#### 139 *Preparation of clodronate liposomes:*

140 Clodronate liposomes were synthesized utilizing a modified protocol from  
141 previous descriptions (Van Rooijen, 1989; van Rooijen, 1992; Zelinka et al., 2012). In  
142 short, approximately 8 mg of L- $\alpha$ -Phosphatidyl-DL-glycerol sodium salt (Sigma P8318)  
143 was dissolved in chloroform. 50 mg of cholesterol was dissolved in chloroform with the  
144 lipids in a sterile microcentrifuge tube. This tube was rotated under nitrogen gas to  
145 evaporate the chloroform and leave a thin lipid-film on the walls of the tube. 158 mg  
146 dichloro-methylene diphosphonate (clodronate; Sigma-Aldrich) dissolved sterile PBS  
147 (pH 7.4) was added to the lipid/cholesterol film and vortexed for 5 minutes. To reduce  
148 size variability of lipid vesicles, the mixture was sonicated at 42 kHz for 6 minutes.  
149 Purification of liposomes was accomplished via centrifugation at 10,000 x G for 15  
150 minutes, aspirated, and resuspended in 150  $\mu$ l PBS. Each retinal injection used

151 between 5 and 20 ul of clodronate-liposome solution. There was a variable yield of  
152 clodronate-liposomes during the purification resulting in some variability per dose. The  
153 dosage was adjusted such that >98% of the microglia are ablated by 2 days after  
154 administration with no off-target cell death or pigmented epithelial cells.

155

### 156 *Single Cell RNA sequencing of retinas*

157 Retinas were obtained from embryonic, postnatal chick, and adult mouse retinas.  
158 Isolated retinas were dissociated in a 0.25% papain solution in Hank's balanced salt  
159 solution (HBSS), pH = 7.4, for 30 minutes, and suspensions were frequently triturated.  
160 The dissociated cells were passed through a sterile 70µm filter to remove large  
161 particulate debris. Dissociated cells were assessed for viability (Countess II; Invitrogen)  
162 and cell-density diluted to 700 cell/µl. Each single cell cDNA library was prepared for a  
163 target of 10,000 cells per sample. The cell suspension and Chromium Single Cell 3' V2  
164 reagents (10X Genomics) were loaded onto chips to capture individual cells with  
165 individual gel beads in emulsion (GEMs) using 10X Chromium Controller. cDNA and  
166 library amplification for an optimal signal was 12 and 10 cycles respectively.  
167 Sequencing was conducted on Illumina HiSeq2500 (Genomics Resource Core Facility,  
168 John's Hopkins University) or HiSeq4000 (Novogene) with 26 bp for Read 1 and 98 bp  
169 for Read 2. Fasta sequence files were de-multiplexed, aligned, and annotated using the  
170 chick ENSEMBL database (GRCg6a, Ensembl release 94) or mouse ENSEMBL database  
171 (GRCm38.p6, Ensembl release 67) and Cell Ranger software. Gene expression was  
172 counted using unique molecular identifier bar codes, and gene-cell matrices were  
173 constructed. Using Seurat toolkits, t-distributed stochastic neighbor embedding (tSNE)  
174 plots or Uniform Manifold Approximation and Projection for Dimension Reduction  
175 (UMAP) plots were generated from aggregates of multiple scRNA-seq libraries (Butler  
176 et al., 2018; Satija et al., 2015). Compiled in each tSNE/UMAP plot are two biological  
177 library replicates for each experimental condition. Seurat was used to construct  
178 violin/scatter plots. Significance of difference in violin/scatter plots was determined using  
179 a Wilcoxon Rank Sum test with Bonferroni correction. Monocle was used to construct  
180 unbiased pseudo-time trajectories and scatter plotters for MG and MGPCs across  
181 pseudotime (Qiu et al., 2017a; Qiu et al., 2017b; Trapnell et al., 2012). Genes that were

182 used to identify different types of retinal cells included the following: (1) Müller glia:  
183 *GLUL*, *VIM*, *SCL1A3*, *RLBP1*, (2) MGPCs: *PCNA*, *CDK1*, *TOP2A*, *ASCL1*, (3) microglia:  
184 *C1QA*, *C1QB*, *CCL4*, *CSF1R*, *TMEM22*, (4) ganglion cells: *THY1*, *POU4F2*, *RBPM2*,  
185 *NEFL*, *NEFM*, (5) amacrine cells: *GAD67*, *CALB2*, *TFAP2A*, (6) horizontal cells:  
186 *PROX1*, *CALB2*, *NTRK1*, (7) bipolar cells: *VSX1*, *OTX2*, *GRIK1*, *GABRA1*, and (7) cone  
187 photoreceptors: *CALB1*, *GNAT2*, *OPN1LW*, and (8) rod photoreceptors: *RHO*, *NR2E3*,  
188 *ARR3*. The MG have an over-abundant representation in the scRNA-seq databases.  
189 This likely resulted from fortuitous capture-bias and/or tolerance of the MG to the  
190 dissociation process.

191

#### 192 *Fixation, sectioning and immunocytochemistry:*

193 Retinal tissue samples were formaldehyde fixed, sectioned, and labeled via  
194 immunohistochemistry as described previously (Fischer et al., 2008; Fischer et al.,  
195 2009d). Antibody dilutions and commercial sources for images used in this study are  
196 described (Table S2). Observed labeling was not due to off-target labeling of secondary  
197 antibodies or tissue autofluorescence because sections incubated exclusively with  
198 secondary antibodies were devoid of fluorescence. Secondary antibodies utilized  
199 include donkey-anti-goat-Alexa488/568, goat-anti-rabbit-Alexa488/568/647, goat-anti-  
200 mouse-Alexa488/568/647, goat-anti-rat-Alexa488 (Life Technologies) diluted to 1:1000  
201 in PBS and 0.2% Triton X-100.

202

#### 203 *Labeling for EdU:*

204 For the detection of nuclei that incorporated EdU, immunolabeled sections were  
205 fixed in 4% formaldehyde in 0.1M PBS pH 7.4 for 5 minutes at room temperature.  
206 Samples were washed for 5 minutes with PBS, permeabilized with 0.5% Triton X-100 in  
207 PBS for 1 minute at room temperature and washed twice for 5 minutes in PBS. Sections  
208 were incubated for 30 minutes at room temperature in a buffer consisting of 100 mM  
209 Tris, 8 mM CuSO<sub>4</sub>, and 100 mM ascorbic acid in dH<sub>2</sub>O. The Alexa Fluor 568 Azide  
210 (Thermo Fisher Scientific) was added to the buffer at a 1:100 dilution.

211

#### 212 *Terminal deoxynucleotidyl transferase dUTP nick end labeling (TUNEL):*

213 The TUNEL assay was implemented to identify dying cells by imaging  
214 fluorescent labeling of double stranded DNA breaks in nuclei. The *In Situ* Cell Death Kit  
215 (TMR red; Roche Applied Science) was applied to fixed retinal sections as per the  
216 manufacturer's instructions.

217

218 *Photography, measurements, cell counts and statistics:*

219 Microscopy images of retinal sections were captured with the Leica DM5000B  
220 microscope with epifluorescence and the Leica DC500 digital camera. High resolution  
221 confocal images were obtained with a Leica SP8 available in The Department of  
222 Neuroscience Imaging Facility at The Ohio State University. Representative images are  
223 modified to have enhanced color, brightness, and contrast for improved clarity using  
224 Adobe Photoshop. In EdU proliferation assays, a fixed region of retina was counted and  
225 average numbers of Sox2 and EdU co-labeled cells. The retinal region selected for  
226 investigation was standardized between treatment and control groups to reduce  
227 variability and improve reproducibility.

228 Similar to previous reports (Fischer et al., 2009a; Fischer et al., 2009b; Ghai et  
229 al., 2009), immunofluorescence was quantified by using ImagePro6.2 (Media  
230 Cybernetics, Bethesda, MD, USA) or Image J (NIH). Identical illumination, microscope,  
231 and camera settings were used to obtain images for quantification. Retinal areas were  
232 sampled from 5.4 MP digital images. These areas were randomly sampled over the  
233 inner nuclear layer (INL) where the nuclei of the bipolar and amacrine neurons were  
234 observed. Measurements of immunofluorescence were performed using ImagePro 6.2  
235 as described previously (Ghai et al., 2009; Stanke et al., 2010; Todd and Fischer,  
236 2015a). The density sum was calculated as the total of pixel values for all pixels within  
237 thresholded regions. The mean density sum was calculated for the pixels within  
238 threshold regions from  $\geq 5$  retinas for each experimental condition. GraphPad Prism 6  
239 was used for statistical analyses.

240 Measurement for immunofluorescence of cFos in the nuclei of MG/MGPCs were  
241 made by from single optical confocal sections by selecting the total area of pixel values  
242 above threshold ( $\geq 70$ ) for Sox2 or Sox9 immunofluorescence (in the red channel) and  
243 copying nuclear cFos from only MG (in the green channel). The MG-specific cFos was



244 quantified (as described below or copied onto a 70% grayscale background for figures.  
245 Measurements of pS6 immunofluorescence were made for a fixed, cropped area  
246 (14,000  $\mu\text{m}^2$ ) of INL, OPL and ONL. Measurements were made for regions containing  
247 pixels with intensity values of 70 or greater (0 = black and 255 = saturated). The total  
248 area was calculated for regions with pixel intensities above threshold. The intensity sum  
249 was calculated as the total of pixel values for all pixels within threshold regions. The  
250 mean intensity sum was calculated for the pixels within threshold regions from  $\geq 5$   
251 retinas for each experimental condition.

252 For statistical evaluation of differences in treatments, a two-tailed paired *t*-test  
253 was applied for intra-individual variability where each biological sample also served as  
254 its own control. For two treatment groups comparing inter-individual variability, a two-  
255 tailed unpaired *t*-test was applied. For multivariate analysis, an ANOVA with the  
256 associated Tukey Test was used to evaluate any significant differences between  
257 multiple groups.

258

## 259 **Results:**

### 260 ***MDK* and *PTN* in embryonic retina:**

261 scRNA-seq retina libraries were established at four stages of development  
262 including E5, E8, E12, and E15. The aggregation of these libraries yielded 22,698 cells  
263 after filtering to exclude doublets, cells with low UMI, and low genes/cell. UMAP plots of  
264 aggregate libraries of embryonic retinas formed clustered of cells into patterns that  
265 correlated to both developmental stage and cell type (Fig. 1a). Cell types were identified  
266 based on expression of well-established markers. Specifically, retinal progenitor cells  
267 from E5 and E8 retinas were identified by expression of *ASCL1*, *CDK1*, and *TOP2A*.  
268 (Supplemental Fig. 1a,b). Maturing MG were identified by expression of *GLUL*, *RLBP1*  
269 and *SLC1A3* (Supplemental Fig. 1a,b).

270 Elevated levels of *MDK* expression were observed in MG at E12 and E15, with  
271 lower levels of expression in immature MG at E8 and retinal progenitor cells at E5 (Fig.  
272 1c,d). *PTN* was prominently expressed in immature and mature MG, but was also  
273 detected in immature amacrine cells (E8), rod photoreceptors (E12), and cone  
274 photoreceptors (E15) (Fig. 1c). Levels of *MDK* and *PTN* were significantly higher in

275 maturing MG compared to immature MG and RPCs (Fig. 1d). Putative receptors and  
276 signal transducers of MDK and PTN include integrin  $\beta$ 1 (*ITGB1*), receptor-like protein  
277 tyrosine phosphatase- $\zeta$  (*PTPRZ1*), chondroitin sulfate proteoglycan 5 (*CSPG5*) and  
278 p21-activated serine/threonine kinase (*PAK1*). These mRNAs had variable, scattered  
279 expression in embryonic retinal cells. Scattered expression of *PTPRZ1*, *ITGB1* and  
280 *PAK1* was observed in RPCs, immature and mature MG (Supplemental Fig. 1c).  
281 *CSPG5* was expressed by developing photoreceptors, amacrine, ganglion and bipolar  
282 cells (Fig. 1c). Additionally, *CSPG5* was expressed at significantly elevated levels by  
283 immature and maturing MG compared to levels in RPCs (Fig. 1c.d).

284 Re-embedding of RPCs and MG for pseudotime analysis revealed a trajectory of  
285 cells with early RPCs and maturing MG at opposite ends of the trajectory (Fig. 1e).  
286 Across the pseudotime trajectory levels of *GLUL* increased, while levels of *CDK1*  
287 decreased (Supplemental Fig. 1e,f). Similar to the pattern of expression of *GLUL*, the  
288 expression of *MDK* and *PTN* increases from retinal progenitors to maturing MG (Fig.  
289 1e,f). Higher levels of expression were observed for both *MDK* and *PTN*, with *PTN* at  
290 low levels in retinal progenitors (Fig. 1f,g). Across pseudotime, levels of *MDK* were high  
291 in early progenitors, with a dip in expression during transition phases, and increased in  
292 maturing MG (Fig. 1f,g). Collectively, these findings suggest that both *PTN* and *MDK*  
293 are up-regulated by maturing MG during late stages of embryonic development, and,  
294 based on patterns of expression of putative receptors, MDK and PTN may have  
295 autocrine and paracrine actions in late-stage embryonic chick retina.

296

### 297 **Upregulation MDK in MG of damaged retinas**

298 scRNA-seq libraries were aggregated for retinal cells obtained from control and  
299 NMDA-damaged retinas at various time points (24, 48 and 72 hrs) after treatment (Fig.  
300 2a). UMAP plots were generated and clusters of different cells were identified based on  
301 well-established patterns of expression (Fig. 2a,b). For example, resting MG formed a  
302 discrete cluster of cells and expressed high levels of *GLUL*, *RLBP1* and *SLC1A3*  
303 (Supplemental Fig. 2a,b). After damage, MG down-regulate markers of mature glia as  
304 they transition into reactive glial cells and into progenitor-like cells that up-regulate  
305 *TOP2A*, *CDK1* and *ESPL1* (Supplemental Fig. 2a,b). *MDK* was expressed at low levels

306 in relatively few resting MG in undamaged retina, unlike maturing MG in late stages of  
307 embryonic retinas (Fig. 1c,e), suggesting a down-regulation of *MDK* in MG as  
308 development proceeds after hatching. The expression of *MDK* was scattered in  
309 oligodendrocytes and Non-astrocytic Inner Retinal Glia (NIRGs). NIRG cells are a  
310 distinct type of glial cells that has been described in the retinas of birds (Rompani and  
311 Cepko 2010; Fischer et al., 2010) and some types of reptiles (Todd et al., 2016).  
312 Following NMDA-induced damage, *MDK* is dramatically upregulated in MG and MGPCs  
313 at 24hrs, 48hrs, and 72hrs after treatment (Fig. 2c,e). In addition, MGPCs maintain high  
314 levels of *MDK* (Fig. 2c,e). By comparison, *PTN* was widely expressed in most types of  
315 retinal cells, and was significantly down-regulated by MG and MGPCs in damaged  
316 retinas (Fig. 2c,e). We queried expression of putative receptors for MDK and PTN,  
317 including *PTPRZ1*, *CSPG5* and Syndecan 4 (*SDC4*). Although *SDC4* was expressed in  
318 scattered retina cells, *SDC4* was low in resting MG and was up-regulated across MG at  
319 24hrs after NMDA-treatment (Fig. 2d,e). *CSPG5* was expressed at high levels in resting  
320 MG, and was down-regulated in activated MG at 24hrs after NMDA and in MGPCs, and  
321 remained elevated in activated MG at 48 and 72hrs after NMDA (Fig. 2d,e). *PTPRZ1*  
322 was not detected in MG, but was expressed at high levels in NIRG cells and in  
323 scattered amacrine and bipolar cells (Fig. 2d). *CSPG5*, *SDC4*, *ITGB1*, and *PTN* were  
324 dynamically expressed by different retinal neurons and NIRG cells in NMDA-damaged  
325 retinas (Supplemental Fig. 2a-e), suggesting that MDK may influence NIRG cells and  
326 neurons following an insult.

327         Analysis of MG and MGPCs in different pseudotime states revealed a branched  
328 trajectory with resting MG, proliferating MGPCs, and activated MG from 72hr after  
329 NMDA-treatment largely confined to different branches and states (Supplemental Fig.  
330 3a-d). The expression of *MDK* across pseudotime positively correlates with a transition  
331 toward an MGPC-phenotype and up-regulation of progenitor markers, such as *CDK1*,  
332 and inversely correlated to resting glial phenotypes with significant down-regulation of  
333 glial markers such as *GLUL* (Supplemental Fig. 3a-d). By comparison, levels of *PTN*  
334 were decreased across pseudotime, with the largest decrease in *PTN* in activated MG  
335 compared to resting MG (Supplemental Fig. 3a-d). Similar to expression patterns of

336 *CDK1*, patterns of expression of *SDC4* are significantly elevated in pseudotime state 4  
337 populated by activated MG and proliferating MGPCs (Supplemental Fig. 3a-d).

338 When comparing MG and MGPCs from 48hrs after NMDA with and without  
339 FGF2 and insulin, the relative levels of *MDK* and *PTN* were significantly decreased (Fig.  
340 2f-i). UMAP plots revealed distinct clustering of MG and MGPCs from retinas from 48hrs  
341 NMDA alone and 48hrs NMDA plus FGF2 and insulin (Fig. 2f-i). Similarly, levels of  
342 *GLUL*, *RLBP1* and *CSPG5* were significantly decreased by FGF2 and insulin in  
343 damaged retinas in both MG and MGPCs (Fig. 2f-i; Supplemental Fig. 3e-g). By  
344 contrast, levels of *CDK1* and *TOP2A* were significantly increased by FGF2 and insulin  
345 in MGPCs in damaged retinas (Supplemental Fig. 3e-g). Collectively, these findings  
346 suggest expression levels of *PTN* reflects a resting glial phenotype and levels are  
347 decreased by damage and further decreased by FGF2 and insulin, whereas expression  
348 levels of *MDK* corresponds with acutely activated glia or maturing glia, which is strongly  
349 induced by damage, but decreased by FGF2 and insulin in damaged retinas.

350

### 351 **MDK, neuroprotection and glial reactivity in damaged retinas**

352 The large, significant up-regulation of *MDK* by MG in NMDA-treated retinas  
353 suggests that this growth factor is involved in the responses of retinal cells to acute  
354 damage. To determine whether MDK influences retinal cells we probed for the  
355 activation of different cell-signaling pathways following a single intraocular injection of  
356 recombinant MDK or PTN. Four hours after delivery of MDK we found a significant up-  
357 regulation of cFOS and pS6 specifically in MG (Fig. 3a-e), suggesting activation of the  
358 mTor-pathway. In addition, amacrine cells appeared to significantly up-regulate cFOS  
359 and NIRG cells up-regulated pS6 in response to MDK (Fig. 3a-e). To test whether cell  
360 signaling was influenced by PP2A-inhibitors, we co-applied fostriecin and calyculin A  
361 with MDK. We found that fostriecin and calyculin A significantly reduced levels of pS6 in  
362 MDK-treated MG (Fig. 3f,g), where cfos activation was unaffected and independent of  
363 PP2A inhibition (data not shown). We failed to find up-regulation of pERK1/2, p38  
364 MAPK, pCREB, pSmad1/5/8, pStat3, and nuclear smad2/3 following intravitreal delivery  
365 of MDK (not shown). We failed to detect changes in cell signaling in response to  
366 intraocular injections of PTN (not shown). Despite distinct activation of cFOS and mTor

367 in MG from a single dose of MDK, four consecutive daily intraocular injections of MDK  
368 or PTN had no significant effect upon MG reactivity or formation of proliferating MGPCs  
369 (not shown).

370 Intravitreal injections of MDK after NMDA-treatment had no significant effect  
371 upon glial reactivity or proliferation of MGPCs, NIRG cells or microglia (not shown). This  
372 likely resulted because endogenous levels of MDK were very high and MDK-mediated  
373 cell-signaling may have been saturated. By comparison, injection of MDK prior to  
374 NMDA-treatment significantly reduced the numbers of proliferating MGPCs that  
375 accumulated EdU or were immunolabeled for pHisH3 (Fig. 4a-d). Similarly, there was a  
376 significant reduction in the number Sox2<sup>+</sup>/Nkx2.2<sup>+</sup> NIRG cells that accumulated in  
377 NMDA-damaged retinas (Fig. 4e,f). To determine whether microglial reactivity was  
378 influenced by MDK we measured the area and intensity sum for CD45  
379 immunofluorescence, which is increased in reactive microglia (Fischer et al., 2014).  
380 Both the area and the intensity of CD45-immunofluorescence was decreased in  
381 response to MDK (Fig. 4g,h). We failed to detect a significant MDK-mediated change in  
382 well-established read-outs of different cell-signaling pathways including pS6, pCREB,  
383 p38 MAPK, pERK1/2, or pStat3 (data not shown).

384 Levels of retinal damage and cell death positively correlate to numbers of  
385 proliferating MGPCs (Fischer and Reh, 2001; Fischer and Reh, 2003). Thus, it is  
386 possible that reduced numbers of proliferating MGPCs resulted from less cell death with  
387 MDK pre-treatment. Using the TUNEL method to labeling dying cells, we found that the  
388 administration of MDK before NMDA-damage significantly reduced numbers of dying  
389 cells (Fig. 4i,j). Decreased numbers of dying cells were observed at both 24h and 72h  
390 after NMDA-treatment with MDK pre-treatment. To complement the cell death studies,  
391 we probed for long-term survival of inner retinal neurons. Although there was no change  
392 in numbers of AP2α<sup>+</sup> amacrine cells, there was a significant increase in numbers of  
393 calretinin<sup>+</sup> cells in retinas treated with MDK (Fig. 4k,i).

394 *PTN* was significantly down-regulated in MG following NMDA-treatment (Fig. 2).  
395 Despite the administration of high doses (1μg/dose) of PTN, intravitreal delivery of PTN  
396 with NMDA had no measurable effects on the formation of MGPCs, the reactivity and  
397 proliferation of microglia, and accumulation of NIRG cells (data not shown). Although

398 these experiments were conducted using recombinant human PTN, there is high  
399 conservation between chick, mouse and human PTN (92% & 93% respectively).

400

#### 401 **Inhibition of MDK-signaling in damaged retinas**

402 MDK-signaling is often upregulated in tissues with proliferating cells, such as  
403 tumors, and this proliferation can be suppressed by inhibition of MDK-signaling (Hao et  
404 al., 2013; Takei et al., 2006). Since levels of *MDK* were dramatically increased in MG in  
405 damaged retinas, we tested whether inhibition of MDK-signaling influenced the  
406 formation of proliferating MGPCs. We applied a MDK-expression inhibitor (MDKi), which  
407 downregulates protein expression in a dose dependent manner (Masui et al., 2016).  
408 However, application of MDKi after NMDA-treatment failed to influence MG, NIRG cells,  
409 or microglia (data not shown). Alternatively, we applied a PTPRZ inhibitor SCB4380 that  
410 targets the intracellular domain of the receptor (Fujikawa et al., 2016). However, this  
411 inhibitor failed to influence MG, NIRG cells or microglia when applied after NMDA-  
412 treatment (not shown). It is likely that MDKi and SCB4380 had poor cellular permeability  
413 or species specificity and these drugs failed to adequately diffuse into the retina and  
414 mediate cellular changes.

415 We next applied an inhibitor of MDK-signaling, sodium orthovanadate ( $\text{Na}_3\text{VO}_4$ )  
416 that suppresses the activity of tyrosine phosphatase activity including PTPRZ1 (Qi et al.,  
417 2001), which was predominantly expressed by NIRG cells and scattered inner retinal  
418 neurons (Fig. 2c). Application of  $\text{Na}_3\text{VO}_4$  with and after NMDA significantly reduced  
419 numbers of proliferating MGPCs (Fig. 5a,b). In addition, treatment with  $\text{Na}_3\text{VO}_4$   
420 significantly increased numbers of NIRG cells in the IPL (Fig. 5c,d) and increased  
421 numbers of dying cells (Fig. 5e,f). Despite this increase in retinal damage, proliferation  
422 of MGPCs was reduced in response to  $\text{Na}_3\text{VO}_4$  after NMDA-induced damage (Fig.  
423 5a,b). The effects of  $\text{Na}_3\text{VO}_4$  on proliferating MGPCs may have been indirect since we  
424 did not detect significant levels of PTPRZ1 in MG (Fig. 2c).

425 We next examined the specificity of  $\text{Na}_3\text{VO}_4$ , by testing whether  $\text{Na}_3\text{VO}_4$  blocked  
426 the effects of MDK when applied with NMDA-treatment. Comparison across treatment  
427 groups (NMDA alone, NMDA +  $\text{Na}_3\text{VO}_4$ , NMDA + MDK, and NMDA +  $\text{Na}_3\text{VO}_4$  + MDK)  
428 revealed a significant decrease in MGPCs in eyes treated with  $\text{Na}_3\text{VO}_4$  and MDK alone

429 (Fig. 5g,h). With the combination of MDK and Na<sub>3</sub>VO<sub>4</sub> there was a significant increase  
430 in proliferating MGPCs relative to treatment with MDK or Na<sub>3</sub>VO<sub>4</sub> alone (Fig. 5h).  
431 However, this level was not increased relative to levels seen with NMDA alone (Fig. 5h).  
432 In addition, the combination of MDK and Na<sub>3</sub>VO<sub>4</sub> resulted in no significant difference in  
433 numbers of TUNEL<sup>+</sup> dying cells compared to NMDA alone (Fig 5i). These findings  
434 suggest that the effects of MDK and Na<sub>3</sub>VO<sub>4</sub> upon proliferating MGPCs and numbers of  
435 dying neurons are mediated by overlapping cellular targets.

436

### 437 **Putative MDK receptors, signal transducers and MGPC formation**

438 MDK has been found to bind and signal through Integrin-Beta 1 (ITGB1)  
439 (Muramatsu et al., 2004). ITGB1 signaling through secondary messengers Integrin  
440 linked kinase (ILK), p21 activated kinase 1 (PAK1), cell division factor 42 (CDC42),  
441 protein phosphatase 2a (PP2A, gene: *PPP2CA*), and Git/Cat-1 regulate cytoskeleton  
442 remodeling, migration, and cellular proliferation (Bagrodia and Cerione, 1999; Ivaska et  
443 al., 1999; Kawachi et al., 2001; Kim et al., 2004; Martin et al., 2016; Mulrooney et al.,  
444 2000) (see Fig. 12). *PAK1* has been implicated as a cell cycle regulator that is  
445 downstream of MDK and PTN signaling (Kawachi et al., 2001). PAKs are components  
446 of the mitogen activated protein kinase (MAPK) pathway and are believed to regulate  
447 small GTP-binding proteins (CDC42 and RAC) (Bagrodia and Cerione, 1999; Frisch,  
448 2000) (see Fig. 12).

449 By probing scRNA-seq libraries we found that *PAK1* was widely expressed at  
450 relatively high levels in resting MG, and levels were significantly reduced in MG at  
451 different times after NMDA, and further reduced in MGPCs (Fig. 6a,b). Similarly, levels  
452 of *PPP2CA*, *CDC42*, *GIT1* and *ILK* were expressed at relatively high levels in resting  
453 MG, but were widely expressed at reduced levels in MGPCs and activated MG in  
454 damaged retinas (Fig. 6a,b). In addition, *PPP2CA*, *CDC42*, *GIT1* and *ILK* were  
455 expressed by different types of retinal neurons, NIRG cells and oligodendrocytes (Fig.  
456 6a). We found that MG expressed *ITGB1* and other integrin isoforms, including *ITGA1*,  
457 *ITGA2*, *ITGA3* and *ITGA6* (Fig. 6a,b). In general, integrins were expressed at high  
458 levels in scattered resting MG, whereas levels were reduced, but more widely  
459 expressed among activated MG, and further reduced in MGPCs (Fig. 6a,b).

460 We next tested how PAK1 and PP2A influence the formation of MGPCs in  
461 NMDA-damaged retinas. MDK-signaling is known to be modulated by the second  
462 messenger PAK1 which is up-regulated in proliferating cancerous cells (Kumar et al.,  
463 2006). IPA3 is an isoform-specific allosteric inhibitor of PAK1 which prevents auto-  
464 phosphorylation (Deacon et al., 2008). Administration of IPA3 with NMDA significantly  
465 decreased numbers of proliferating MGPCs (Fig. 6c,d). By contrast, IPA3 had no  
466 significant effect upon the proliferation and accumulation of NIRG cells or microglia  
467 (Supplemental Fig. 4). Unlike Na<sub>3</sub>VO<sub>4</sub>, IPA3 had no impact on numbers of TUNEL<sup>+</sup> cells  
468 compared to those seen in retinas treated with NMDA alone (Supplemental Fig. 4).  
469 Since *PAK1* expression was most prevalent in resting MG and decreased after NMDA  
470 damage, we tested whether application of IPA3 prior to NMDA influenced glial cells and  
471 neuronal survival. We found that IPA3 prior to NMDA resulted in a significant decrease  
472 in proliferating MGPCs (Fig. 6e), whereas there was no significant difference in  
473 numbers of dying cells or proliferation of microglia and NIRG cells (Supplemental Fig.  
474 4). Similar to the effects of IPA3, two different inhibitors to PP2A, fostriecin and calyculin  
475 A, significantly decreased numbers of proliferating MGPCs in NMDA-damaged retinas  
476 (Fig. 6f-h). Fostriecin and calyculin A had relatively little effect upon the accumulation,  
477 reactivity, cell death and proliferation of NIRG cells and microglia, with the exception of  
478 a small but significant decrease in proliferating microglia with calyculin A-treatment  
479 compared to controls (Supplemental Fig. 4). Collectively, these findings suggest that  
480 inhibition of signal-transducers of MDK-signaling suppresses the formation of MGPCs.  
481

#### 482 ***MDK in retinas treated with insulin and FGF2***

483 In the postnatal chick retina, the formation of proliferating MGPCs can be  
484 induced by consecutive daily injections of Fibroblast growth factor 2 (FGF2) and insulin  
485 in the absence of neuronal damage (Fischer et al., 2002b). Eyes were treated with two  
486 or three consecutive daily doses of FGF2 and insulin and retinas were processed to  
487 generate scRNA-seq libraries. Cells were clustered based on their gene expression in  
488 UMAP plots and colored by their library of origin (Fig. 7a,b). MG glia were identified  
489 based on collective expression of *VIM*, *GLUL* and *SLC1A3* and MGPCs were identified  
490 based on expression of *TOP2A*, *NESTIN*, *CCNB2* and *CDK1* for MGPCs (Supplemental



491 Fig. 5a,b). Resting MG from saline-treated retinas formed a cluster distinct from MG  
492 from retinas treated with two- and three-doses of FGF2+insulin based on unique  
493 patterns of gene expression (Fig. 7b; Supplemental Fig. 5a,b). Additionally, MG treated  
494 with 2 versus 3 doses of insulin and FGF2 were sufficiently dissimilar to follow different  
495 trajectories of gene expression in pseudotime analysis (Supplemental Fig. 5c,d).

496 Similar to patterns of express in NMDA-damaged retinas, there was a significant  
497 increase in *MDK* with growth factor-treatment as demonstrated by patterns of  
498 expression in UMAP and violin plots, and pseudotime analyses (Fig. 7c-e;  
499 Supplemental Fig. 5d-f). By comparison, levels of *PTN* were significantly decreased in  
500 MG following treatment with insulin and FGF2 (Fig. 7c,e; Supplemental Fig. 5d-f).  
501 Similarly, levels of *PAK1* were decreased in activated MG and MGPCs in response to  
502 growth factor treatment (Fig. 7d,e; Supplemental Fig. 5e,f). *CSPG5* was widely  
503 expressed at high levels in scattered resting MG, and was significantly reduced in MG  
504 and MGPCs following treatment with insulin and FGF2 (Fig. 7d,e; Supplemental Fig. 5e,  
505 f). *ITGB1* expression was scattered in resting MG, and decreased slightly in MG and  
506 MGPCs treated with insulin and FGF2 (Fig. 7d,e; Supplemental Fig. 5e,f). In sum,  
507 treatment with FGF2 and insulin in the absence of retina damage influenced patterns of  
508 expression for MDK-related genes similar to those seen in NMDA-damaged retinas.

509 We next isolated MG, aggregated and normalized scRNA-seq data from saline-,  
510 NMDA-, FGF2+insulin- and NMDA/FGF2+insulin-treated retinas to directly compare  
511 levels of *MDK*, *PTN* and related factors. UMAP plots revealed distinct clustering of MG  
512 from control retinas and MG from 24hrs after NMDA-treatment, whereas MG from  
513 retinas at 48 and 72hrs after NMDA and from retinas treated with insulin and FGF2  
514 formed a large cluster with distinct regions (Fig. 8a-e). UMAP and Dot plots revealed  
515 distinct patterns of expression of genes associated with resting MG, de-differentiating  
516 MG, activated MG and proliferating MGPCs (Fig. 8c-e). Different zones, representing  
517 MGPCs in different phases of the cell cycle were comprised of cells from different times  
518 after NMDA-treatment and FGF2+insulin-treatment (Fig. 8e). Expression of *MDK* was  
519 most widespread and significantly up-regulated in MG in damaged retinas and MGPCs  
520 compared to MG from retinas treated with insulin and FGF2 (Fig. 8f). Compared to  
521 levels seen in resting MG, levels of *PTN* were reduced in activated MG from damaged

522 retinas and MGPCs, and levels were further decreased in MG from normal and  
523 damaged retinas that were treated with insulin and FGF2 (Fig. 8f); similar patterns of  
524 expression were seen for *PAK1*, *CSPG5*, *ITGB1*, *PPP2CA* and *CDC42*. By contrast,  
525 levels of *SDC4* were highest and most widespread in MG at 24hrs after NMDA-  
526 treatment and were relatively reduced in all other groups of MG and MGPCs (Fig. 8f).  
527 Collectively, these findings indicate that damaged-induced changes of *MDK*, *PTN* and  
528 related factors in MG are very dramatic, and these changes in relative expression levels  
529 in MG are dampened by insulin and FGF2 whether applied to undamaged or damaged  
530 retinas.

531

### 532 **MDK and MGPCs in undamaged retinas.**

533 In the absence of damage, in retinas treated with FGF2 and insulin, we tested  
534 whether MDK influences MG and the formation of MGPCs. MDK was administered two  
535 days before and with three consecutive daily doses of FGF2 and insulin (Fig. 9). MDK-  
536 treatment had no significant influence upon the formation of proliferating MGPCs or the  
537 accumulation of NIRG cells (Fig. 9a,b,c). We next tested whether inhibition of PAK1 with  
538 IPA3 influenced glial cells in retinas treated with FGF2 and insulin. IPA3-treatment had  
539 no significant influence upon the formation of proliferating MGPCs, NIRG cells or  
540 microglia (Fig. 9d-g), but did have a small, but significant, inhibitory effect upon the  
541 accumulation of NIRG cells (Fig. 9h). We next tested whether inhibition of PTPRZ with  
542  $\text{Na}_3\text{VO}_4$  influenced the glial cells in retinas treated with FGF2 and insulin. There was no  
543 significant difference in numbers of proliferating MGPCs following 3 days of treatment  
544 with insulin and FGF2 with  $\text{Na}_3\text{VO}_4$  (Fig. 9i). Similarly, MDKi inhibitor had no effect upon  
545 the formation of proliferating MGPCs (not shown). However, there was an increase in  
546 the total number of NIRG cells in the retina in response to  $\text{Na}_3\text{VO}_4$  treatment (Fig. 9j-k).  
547 The reactivity and accumulation of microglia were unaffected by the  $\text{Na}_3\text{VO}_4$  or IPA3  
548 (data not shown).

549

### 550 ***Mdk*, *Ptn* and MDK-receptors in damaged mouse retinas**

551 We next sought to assess the expression of *Mdk* and related factors in normal  
552 and NMDA-damaged mouse retinas. Comparison of the different responses of glial cells

553 across species can indicate important factors that confer the potential of MG to  
554 reprogram into MGPCs (Hoang et al., 2019). UMAP analysis of cells from control and  
555 NMDA-damage mouse retinas revealed discrete clusters of different cell types (Fig.  
556 10a). Neuronal cells from control and damaged retinas were clustered together,  
557 regardless of time after NMDA-treatment (Fig. 10a). By contrast, resting MG, which  
558 included MG from 48 and 72 hrs after NMDA, and activated MG from 3, 6, 12 and 24  
559 hours after treated were spatially separated in UMAP plots (Fig. 10a,b). Pseudotime  
560 analysis placed resting MG (control and some MG from 48 and 72 hrs after treatment)  
561 to the left, MG from 3 and 6 hrs after treatment to the far right, and MG from 12 and 24  
562 hrs bridging the middle (Supplemental Fig. 6a-d). Unlike chick MG, mouse MG rapidly  
563 downregulate *Mdk* in response to damage and this downregulation is maintained  
564 through 72 hrs after treatment (Fig. 10c,d). Similar to MG in the chick, *Ptn* was rapidly  
565 and significantly down-regulated at 3hrs, and further down-regulated at 6hrs, and  
566 sparsely expressed at 12-48hrs (Fig. 10c,d). Levels of *Pak1* were low in resting MG,  
567 and elevated in MG only at 3hrs after NMDA-treatment (Fig. 10c,d). Similar to chick MG,  
568 *Cspg5* was significantly decreased in activated MG in damaged retinas (Fig. 10c,d). By  
569 contrast, there were significant increases in levels of *Sdc4* and *Itgb1* in MG in damaged  
570 retinas (Fig. 10c,d; Supplemental Fig. 6e-g). We further analyzed the responses of MG  
571 in damaged retinas at 48hrs after NMDA ± treatment with insulin and FGF2, which is  
572 known to stimulate proliferation of MG (Karl et al., 2008a). Treatment with FGF2 and  
573 insulin in damaged retinas significantly reduced levels of *Glul*, whereas levels of *Vim*  
574 and *Gfap* were significantly increased (Supplemental Fig. 6h-j). By comparison, levels of  
575 *Mdk* and *Sdc4* were significantly increased in MG in retinas treated with  
576 NMDA+FGF2/insulin, whereas levels of *Ptn*, *Cspg5* and *Itgb1* were unchanged  
577 (Supplemental Fig. 6h-j).

578 We next investigated the activation of different cell-signaling pathways in retinal  
579 cells in response to intravitreal delivery of MDK. We failed to detect activation of NFkB,  
580 pStat3, pSmad1/5/8, pCREB, p38 MAPK or pERK1/2 (not shown). However, in  
581 response to a single injection of MDK, we found a selective and significant up-regulation  
582 of cFOS and pS6 in MG (Fig. 11a-e), similar to that observed in chick retina. Other  
583 types of retinal cells did not appear to respond to MDK with up-regulation of cFOS or

584 pS6. We next tested whether intraocular injections of MDK combined with NMDA-  
585 induced damage influences the proliferation of MG in the mouse retina. Consistent with  
586 previous reports (Karl et al., 2008b), there were very few proliferating MG in NMDA-  
587 damaged retinas (Fig. 11f,h). By contrast, application of MDK with NMDA resulted in a  
588 small, but significant increase in numbers of proliferating MG (Fig. 11f-h).

589

## 590 **Discussion:**

591 In the chick retina, we find that dynamic expression of *MDK* during retinal  
592 development and in mature retinas following injury or growth factor-treatment. High  
593 levels of *MDK* expression were selectively and rapidly induced in MG following damage  
594 or treatment with insulin and FGF2, with larger increases in expression seen in  
595 damaged tissues. Addition of exogenous MDK before damage was neuroprotective and  
596 resulted in decreased numbers of proliferating MGPCs. Antagonism of MDK-signaling  
597 reduced numbers of proliferating MGPCs and stimulated the accumulation of NIRG cells  
598 and increased numbers of dying cells. Na<sub>3</sub>VO<sub>4</sub> and PAK1 antagonist had differential  
599 effects on NIRG cells and cell death that were context dependent. In contrast to the  
600 findings in chick, we find that *Mdk* is down-regulated by MG in damaged mouse retinas.  
601 In both chick and mouse retinas, exogenous MDK selectively induces mTOR-signaling  
602 and expression of cFOS in MG.

603

## 604 *PTN signaling in the retina*

605 PTN and MDK are in the same family of growth factors and are both dynamically  
606 expressed in the developing, damaged, and growth factor treated retinas. Although  
607 treatment with MDK had varying effects on MG, microglia, NIRGs, and neurons, PTN  
608 administration failed to illicit detectable effects upon retinal cells. Levels of *PTN* are high  
609 in resting MG and down-regulated in response to neuronal damage or treatment with  
610 insulin and FGF2. In principle, PTN acts at the same receptors as MDK, but expression  
611 of receptor isoforms may underlie the different cellular responses to MDK and PTN.  
612 PTN has preferred binding-affinity for SDC4 and ITGB3, whereas MDK has preferred  
613 binding-affinity for SDC3 and ITGB1 (Muramatsu et al., 2004; Raulo et al., 1994; Xu et  
614 al., 2014), which are expression by bipolar cells and MG.

615 PTN and MDK may induce different biological effects on the same receptors. For  
616 instance, data suggests that there may be differential receptor activity between PTN  
617 and MDK on the PTPRz receptor. Binding of PTN to PTPRz induces oligomerization of  
618 the receptor that reduces phosphatase activity (Fukada et al., 2006). Conversely, MDK  
619 promotes embryonic neuronal survival in a PTPRz receptor complex, which is inhibited  
620 by Na<sub>3</sub>VO<sub>4</sub> (Sakaguchi et al., 2003). Although we failed to detect PTN-mediated effects  
621 upon retinal cells, PTN may serve other important biological roles in retinal  
622 homeostasis, glial phenotype/functions or neuroprotection in other models of retinal  
623 damage.

624

#### 625 *Receptor expression and cells responding to MDK*

626 The effects of MDK on retinal glia has not been studied in mammals or birds. In  
627 acutely damaged chick retina, MG are capable of forming numerous proliferating  
628 progenitor cells (MGPCs), but few of the progeny differentiate into neurons (Fischer and  
629 Reh, 2001; Fischer and Reh, 2002). The reprogramming of MG into MGPCs can be  
630 induced by FGF2 and insulin in the absence of damage through MAPK signaling  
631 (Fischer and Reh, 2002; Fischer et al., 2002a; Fischer et al., 2002b). Similarly, IGF1,  
632 BMP, retinoic acid, sonic hedgehog, Wnt, and Jak/Stat agonists have been observed to  
633 enhance the formation of MGPCs (Fischer et al., 2009c; Fischer et al., 2009d; Gallina et  
634 al., 2015; Todd and Fischer, 2015b; Todd et al., 2016; Todd et al., 2017; Todd et al.,  
635 2018). Consistent across the different signaling pathways that drive the formation of  
636 proliferating MGPCs is the up-regulation of cFOS and necessity for mTor-signaling in  
637 reprogramming MG (Zelinka et al., 2016). Previous reports have provided many  
638 examples of MDK activating cell-signaling pathways that drive proliferation (Reiff et al.,  
639 2011; Winkler and Yao, 2014). Accordingly, we propose that MDK-mediated cell-  
640 signaling that results in activation of cFOS and mTOR contributes to the network of  
641 pathways that drive the formation of proliferating MGPCs in the chick retinas.

642 Patterns of expression for receptors suggests that glial cells and inner retinal  
643 neurons are targets of MDK and PTN. In MG the predominant receptor is *ITGB1*,  
644 whereas NIRGs cells express *PTPRZ1*, and amacrine and bipolar cells express a  
645 combination of *PTPRZ1* and *SDC4*. The mechanism by which *ITGB1* and *PTPRZ*

646 influence cell cycle and differentiation are distinctly different. PTPRZ promotes stem cell  
647 characteristics and ligand binding inhibits this phosphatase function (Fujikawa et al.,  
648 2016; Fukada et al., 2006; Kuboyama et al., 2015). Signal transduction through ITGB1  
649 influences cytoskeleton remodeling that is associated with cell migration and  
650 proliferation (Muramatsu et al., 2004). ITGB1 can activate or inhibit secondary  
651 messengers depending on tyrosine phosphorylation (Kim et al., 2004; Mulrooney et al.,  
652 2000; Song et al., 2014). Ligand binding to ITGB1 initiates tyrosine phosphorylation of  
653 intracellular domains, and integrin linked kinases (ILKs) activate PP2A and cell cycle  
654 kinases, such as CDC42 (Ivaska et al., 1999; Ivaska et al., 2002). The transcriptional  
655 profiles of individual retinal cell types suggest that MDK and PTN likely have autocrine  
656 and paracrine actions that are dynamically regulated in damaged retinas and  
657 manifested through MG, and dynamic regulation of mRNA is strongly correlated with  
658 changes in protein levels and function (Liu et al., 2016).

659

#### 660 *MDK-signaling in MG*

661 Application of MDK prior to NMDA-induced damage decreased numbers of  
662 proliferating MGPCs and decreased numbers of dying cells. Levels of retinal damage  
663 positively correlate to the proliferative response of MG (Fischer and Reh, 2001; Fischer  
664 et al., 2004). We propose that the neuroprotective effects of MDK secondarily  
665 influenced the proliferative of MGPCs. It is possible that the addition of MDK to  
666 damaged retinas failed to influence MGPCs because of “ceiling effects” wherein (i)  
667 ligand/receptor interactions are saturated, (ii) the activity of secondary messengers are  
668 saturated, or (iii) the massive up-regulation of MDK by MG is not directly involved in  
669 driving the formation of proliferating MGPCs.

670 Phosphatase inhibitor  $\text{Na}_3\text{VO}_4$  suppressed the formation of MGPCs and  
671 increased cell death, and these effects were blocked by addition of MDK. Inhibition of  
672 intracellular phosphatases, such as PP2A that are commonly associated with ITGB1  
673 receptors, increasing the upstream activation may be attributed to restoring MG  
674 responses to damage. Inhibition of Glt/Cat-1/PAK1-signaling associated with ITGB1-  
675 mediated cytoskeleton remodeling during migration and proliferation (Martin et al., 2016;  
676 Muramatsu et al., 2004). Consistent with these observations, we found that inhibition of

677 PAK1 and PP2A effectively suppressed the formation of MGPCs in damaged retinas.  
678 Further studies are required to identify changes in phosphorylation and expression that  
679 are down-stream of PP2A activity.

680 MDK and cell-signaling inhibitors failed to have significant impacts upon MG and  
681 microglia in retinas treated with insulin and FGF2. Similar to NMDA-treatment, we see  
682 significant changes in expression levels of *MDK*, *PTN*, *PAK1* and *CSPG5*, suggesting  
683 that MDK-signaling is active in undamaged retinas treated with insulin and FGF2 (see  
684 Fig. 7). However, direct comparison of relative expression levels of *MDK* and related  
685 genes across all treatment groups indicated that: (i) although *MDK* is up-regulated with  
686 insulin and FGF2, levels are much less than those seen with NMDA alone, (ii) *SDC4* is  
687 modestly induced in MG by insulin and FGF2, and (iii) levels of *PAK1*, *CSPG5*, *ITGB1*,  
688 *PPP2CA* and *CDC4* are further down-regulated by insulin and FGF2 compared to levels  
689 seen with NMDA-treatment. The diminished levels of MDK-receptors and signal  
690 transducers in MG treated with insulin and FGF2, compared to levels in MG treated with  
691 NMDA, may underlie the absence of effects of exogenous MDK and inhibitors. This  
692 suggests that MDK and down-stream signaling are not required for the formation of  
693 MGPCs in retinas treated with insulin+FGF2. Alternatively, the cell-signaling pathways  
694 that are activated by MDK are the same as those activated by insulin+FGF2 and there  
695 is no net gain in second messenger activation in MG by combining these factors. This is  
696 unique because many signaling pathways that have been implicated in regulating the  
697 formation of MGPCs in the chick retina are active following NMDA-induced damage and  
698 treatment with insulin and FGF2. These pathways include MAPK (Fischer et al., 2009a;  
699 Fischer et al., 2009b), mTOR (Zelinka et al., 2016), Notch (Ghai et al., 2010; Hayes et  
700 al., 2007), Jak/Stat (Todd et al., 2016), Wnt/b-catenin (Gallina et al., 2015),  
701 glucocorticoid (Gallina, 2015), Hedgehog (Todd and Fischer, 2015b), BMP/SMAD (Todd  
702 et al., 2017), retinoic acid (Todd et al., 2018) and NFkB-signaling (Palazzo et al., 2020).

703

#### 704 *MDK signaling in NIRG cells*

705 A well-established receptor of MDK is PTPRz (Maeda et al., 1999). PTPRz is a  
706 cell-surface receptor that acts as a protein tyrosine phosphatase and is known to  
707 promotes proliferation (Fujikawa et al., 2016). This receptor is activated by MDK

708 (Sakaguchi et al., 2003), but is deactivated by the binding of PTN through dimerization  
709 and tyrosine phosphorylation (Kuboyama et al., 2015). NIRG cells predominantly  
710 express *PTPRZ1* and the accumulation of these cells in response to damage was  
711 decreased with MDK-treatment and increased by treatment with phosphatase inhibitor  
712  $\text{Na}_3\text{VO}_4$ . The accumulation of NIRG cells may result, in part, from migration, as MDK  
713 has been associated with migration and process elongation in different cell types  
714 (Ichihara-Tanaka et al., 2006; Kuboyama et al., 2015; Qi et al., 2001). Given that  
715 nothing is currently known about the specific functions of NIRG cells, it is difficult to infer  
716 how activation/inhibition of MDK-signaling in these glia impacts the reprogramming of  
717 MG or function/survival of retinal neurons.

718

#### 719 *MDK and reprogramming of MG into MGPCs*

720 There has been significant research understanding the cell-signaling pathways  
721 involved in the reprogramming of MG into proliferating MGPCs. IGF1, BMP, retinoic  
722 acid, HB-EGF, sonic hedgehog, Wnt, and CNTF are known to enhance the formation of  
723 MGPCs (Fischer et al., 2009c; Fischer et al., 2009d; Gallina et al., 2015; Todd and  
724 Fischer, 2015b; Todd et al., 2016; Todd et al., 2017; Todd et al., 2018). The roles of  
725 these different pathways are similar in chick and zebrafish models of retinal  
726 regeneration, despite different capacities for neurogenesis (Goldman, 2014; Wan and  
727 Goldman, 2016). MDK has been implicated as an important factor to drive de-  
728 differentiation MG into proliferating progenitor cells (Calinescu et al., 2009; Luo et al.,  
729 2012; Nagashima et al., 2019). In the chick model, different inhibitors to PAK1, PP2A  
730 and *PTPRZ1* had relatively modest impacts on the formation of MGPCs. Although  
731 exogenous MDK likely added nothing to already saturated levels in damaged retinas,  
732 MDK alone was not sufficient to induce the formation of MGPCs in the absence of  
733 damage when levels of MDK were low. These findings suggest that MDK signaling is  
734 not a primary signaling component to drive the formation of MGPCs in chick, unlike the  
735 key role for MDK seen in zebrafish (Gramage et al., 2015; Nagashima et al., 2019). In  
736 the chick, our findings suggests that MDK has pleiotropic roles and serves to both  
737 minimize neuronal cell death after damage and regulate the accumulation of NIRG cells.  
738 By comparison to effects seen in chick MG, MDK stimulated mTor-signaling and cFos



739 expression in mouse MG and induced a modest increase in numbers of proliferating MG  
740 in damaged retinas. The neurogenic potential of these few proliferating MG remains to  
741 be determined.

742

743

744 **Conclusions:**

745 *MDK* and *PTN* are highly expressed by maturing MG in embryonic retinas, and  
746 *MDK* is down-regulated while *PTN* remains highly expressed by resting MG in the  
747 retinas of hatched chicks. In mature mouse retinas, *PTN* had similar patterns of  
748 expression, whereas *MDK* showed patterns of expression opposite to those seen in  
749 chick MG. When MG are stimulated by growth factors or neuronal damage in the chick  
750 model, *MDK* is robustly up-regulated whereas *PTN* is down-regulated. Injections of  
751 *MDK* had significant effects upon proliferating glia, formation of MGPCs, and glial  
752 reactivity, whereas we failed to detect cellular responses to exogenous *PTN*. Elevated  
753 *MDK* demonstrated survival-promoting effects upon neurons, and subsequently  
754 suppressed MGPC formation. Inhibiting factors associated with the ITGB1 signaling  
755 complex dampened MGPC formation and phosphatase inhibitor  $\text{Na}_3\text{VO}_4$  over-rode the  
756 effects of *MDK* upon neuronal survival and MGPC formation. This effect was limited to  
757 damaged retinas, whereas in retinas treated with insulin+FGF2 there may be a  
758 convergence or over-lap of cell-signaling pathways activated by *MDK* and  
759 insulin+FGF2. In determining its effectiveness at driving dedifferentiation and  
760 proliferation of MG in mouse models of excitotoxic damage, only a small but significant  
761 increase in MGPCs was observed. Overall, the up regulation of *MDK* is among the  
762 largest increases in gene expression detected in MG stimulate by damage or growth  
763 factors, implying significant multifactorial functions in the context of development,  
764 reprogramming, and response to tissue damage.

765

766 **Author contributions:** WAC – experimental design, execution of experiments,  
767 collection of data, data analysis, construction of figures and writing the manuscript. MF  
768 and IP – execution of experiments and collection of data. TH and SB – preparation of

769 scRNA-seq libraries. AJF – experimental design, data analysis, construction of figures  
770 and writing the manuscript.

771

772 **Competing Interests:** The authors have no competing interests to declare.

773

774 **Data availability:** RNA-Seq data are deposited in GEO (GSE135406)

775 Chick scRNA-Seq data can be queried at

776 <https://proteinpaint.stjude.org/F/2019.retina.scRNA.html>.

777

778

779 **References:**

- 780 **Bagrodia, S. and Cerione, R. A.** (1999). PAK to the future. *Trends Cell Biol.* **9**, 350–355.
- 781 **Bernardos, R. L., Barthel, L. K., Meyers, J. R. and Raymond, P. A.** (2007). Late-stage  
782 neuronal progenitors in the retina are radial Muller glia that function as retinal stem cells.  
783 *J Neurosci* **27**, 7028–40.
- 784 **Butler, A., Hoffman, P., Smibert, P., Papalexli, E. and Satija, R.** (2018). Integrating single-cell  
785 transcriptomic data across different conditions, technologies, and species. *Nat.*  
786 *Biotechnol.* **36**, 411–420.
- 787 **Calinescu, A.-A., Vihtelic, T. S., Hyde, D. R. and Hitchcock, P. F.** (2009). The Cellular  
788 Expression of Midkine-a and Midkine-b During Retinal Development and Photoreceptor  
789 Regeneration in Zebrafish. *J. Comp. Neurol.* **514**, 1–10.
- 790 **Dai, L.-C., Yao, X., Wang, X., Niu, S.-Q., Zhou, L.-F., Fu, F.-F., Yang, S.-X. and Ping, J.-L.**  
791 (2009). In vitro and in vivo suppression of hepatocellular carcinoma growth by midkine-  
792 antisense oligonucleotide-loaded nanoparticles. *World J. Gastroenterol. WJG* **15**, 1966–  
793 1972.
- 794 **Deacon, S. W., Beeser, A., Fukui, J. A., Rennefahrt, U. E. E., Myers, C., Chernoff, J. and**  
795 **Peterson, J. R.** (2008). An isoform-selective, small-molecule inhibitor targets the  
796 autoregulatory mechanism of p21-activated kinase. *Chem. Biol.* **15**, 322–331.
- 797 **Fabri, L., Maruta, H., Muramatsu, H., Muramatsu, T., Simpson, R. J., Burgess, A. W. and**  
798 **Nice, E. C.** (1993). Structural characterisation of native and recombinant forms of the  
799 neurotrophic cytokine MK. *J. Chromatogr.* **646**, 213–225.
- 800 **Fausett, B. V. and Goldman, D.** (2006). A role for alpha1 tubulin-expressing Muller glia in  
801 regeneration of the injured zebrafish retina. *J Neurosci* **26**, 6303–13.
- 802 **Fausett, B. V., Gumerson, J. D. and Goldman, D.** (2008). The proneural basic helix-loop-helix  
803 gene *ascl1a* is required for retina regeneration. *J. Neurosci. Off. J. Soc. Neurosci.* **28**,  
804 1109–1117.
- 805 **Fischer, A. J. and Reh, T. A.** (2001). Müller glia are a potential source of neural regeneration in  
806 the postnatal chicken retina. *Nat. Neurosci.* **4**, 247–252.
- 807 **Fischer, A. J. and Reh, T. A.** (2002). Exogenous growth factors stimulate the regeneration of  
808 ganglion cells in the chicken retina. *Dev Biol* **251**, 367–79.
- 809 **Fischer, A. J. and Reh, T. A.** (2003). Potential of Muller glia to become neurogenic retinal  
810 progenitor cells. *Glia* **43**, 70–6.
- 811 **Fischer, A. J., Seltner, R. L. P., Poon, J. and Stell, W. K.** (1998). Immunocytochemical  
812 characterization of quisqualic acid- and N-methyl-D-aspartate-induced excitotoxicity in  
813 the retina of chicks. *J. Comp. Neurol.* **393**, 1–15.
- 814 **Fischer, A. J., Dierks, B. D. and Reh, T. A.** (2002a). Exogenous growth factors induce the  
815 production of ganglion cells at the retinal margin. *Development* **129**, 2283–91.

- 816 **Fischer, A. J., McGuire, C. R., Dierks, B. D. and Reh, T. A.** (2002b). Insulin and Fibroblast  
817 Growth Factor 2 Activate a Neurogenic Program in Müller Glia of the Chicken Retina. *J.*  
818 *Neurosci.* **22**, 9387–9398.
- 819 **Fischer, A. J., Foster, S., Scott, M. A. and Sherwood, P.** (2008). The transient expression of  
820 LIM-domain transcription factors is coincident with the delayed maturation of  
821 photoreceptors in the chicken retina. *J. Comp. Neurol.* **506**, 584–603.
- 822 **Fischer, A. J., Scott, M. A., Ritchey, E. R. and Sherwood, P.** (2009a). Mitogen-activated  
823 protein kinase-signaling regulates the ability of Müller glia to proliferate and protect  
824 retinal neurons against excitotoxicity. *Glia* **57**, 1538–1552.
- 825 **Fischer, A. J., Scott, M. A. and Tuten, W.** (2009b). Mitogen-activated protein kinase-signaling  
826 stimulates Muller glia to proliferate in acutely damaged chicken retina. *Glia* **57**, 166–81.
- 827 **Fischer, A. J., Scott, M. A. and Tuten, W.** (2009c). Mitogen-activated protein kinase-signaling  
828 stimulates Muller glia to proliferate in acutely damaged chicken retina. *Glia* **57**, 166–81.
- 829 **Fischer, A. J., Scott, M. A., Ritchey, E. R. and Sherwood, P.** (2009d). Mitogen-activated  
830 protein kinase-signaling regulates the ability of Müller glia to proliferate and protect  
831 retinal neurons against excitotoxicity. *Glia* **57**, 1538–1552.
- 832 **Fischer, A. J., Zelinka, C., Gallina, D., Scott, M. A. and Todd, L.** (2014). Reactive microglia  
833 and macrophage facilitate the formation of Müller glia-derived retinal progenitors. *Glia*  
834 **62**, 1608–1628.
- 835 **Frisch, S. M.** (2000). cAMP takes control. *Nat. Cell Biol.* **2**, E167–E168.
- 836 **Fujikawa, A., Nagahira, A., Sugawara, H., Ishii, K., Imajo, S., Matsumoto, M., Kuboyama,**  
837 **K., Suzuki, R., Tanga, N., Noda, M., et al.** (2016). Small-molecule inhibition of PTPRZ  
838 reduces tumor growth in a rat model of glioblastoma. *Sci. Rep.* **6**, 20473.
- 839 **Fukada, M., Fujikawa, A., Chow, J. P. H., Ikematsu, S., Sakuma, S. and Noda, M.** (2006).  
840 Protein tyrosine phosphatase receptor type Z is inactivated by ligand-induced  
841 oligomerization. *FEBS Lett.* **580**, 4051–4056.
- 842 **Gallina, D. Z., C. P. Cebulla, C. M. Fischer, A. J.** (2015). Activation of glucocorticoid receptors  
843 in Müller glia is protective to retinal neurons and suppresses microglial reactivity. *Exp*  
844 *Neurol* **273**, 114–125.
- 845 **Gallina, D., Palazzo, I., Steffenson, L., Todd, L. and Fischer, A. J.** (2015). Wnt/betacatenin-  
846 signaling and the formation of Muller glia-derived progenitors in the chick retina. *Dev*  
847 *Neurobiol.*
- 848 **Ghai, K., Zelinka, C. and Fischer, A. J.** (2009). Serotonin released from amacrine neurons is  
849 scavenged and degraded in bipolar neurons in the retina. *J Neurochem* **111**, 1–14.
- 850 **Ghai, K., Zelinka, C. and Fischer, A. J.** (2010). Notch signaling influences neuroprotective and  
851 proliferative properties of mature Muller glia. *J Neurosci* **30**, 3101–12.

- 852 **Goldman, D.** (2014). Müller glial cell reprogramming and retina regeneration. *Nat. Rev.*  
853 *Neurosci.* **15**, 431–442.
- 854 **Gramage, E., Li, J. and Hitchcock, P.** (2014). The expression and function of midkine in the  
855 vertebrate retina. *Br J Pharmacol* **171**, 913–23.
- 856 **Gramage, E., D’Cruz, T., Taylor, S., Thummel, R. and Hitchcock, P. F.** (2015). Midkine-a  
857 Protein Localization in the Developing and Adult Retina of the Zebrafish and Its Function  
858 During Photoreceptor Regeneration. *PLoS ONE* **10**,.
- 859 **Hao, H., Maeda, Y., Fukazawa, T., Yamatsuji, T., Takaoka, M., Bao, X.-H., Matsuoka, J.,  
860 Okui, T., Shimo, T., Takigawa, N., et al.** (2013). Inhibition of the Growth Factor  
861 MDK/Midkine by a Novel Small Molecule Compound to Treat Non-Small Cell Lung  
862 Cancer. *PLOS ONE* **8**, e71093.
- 863 **Hayes, S., Nelson, B. R., Buckingham, B. and Reh, T. A.** (2007). Notch signaling regulates  
864 regeneration in the avian retina. *Dev Biol* **312**, 300–11.
- 865 **Hitchcock, P. F. and Raymond, P. A.** (1992). Retinal regeneration. *Trends Neurosci* **15**, 103–  
866 8.
- 867 **Hoang, T., Wang, J., Boyd, P., Wang, F., Santiago, C., Jiang, L., Lahne, M., Todd, L. J.,  
868 Saez, C., Yoo, S., et al.** (2019). Cross-species transcriptomic and epigenomic analysis  
869 reveals key regulators of injury response and neuronal regeneration in vertebrate  
870 retinas. *bioRxiv* 717876.
- 871 **Ichihara-Tanaka, K., Oohira, A., Rumsby, M. and Muramatsu, T.** (2006). Neuroglycan C Is a  
872 Novel Midkine Receptor Involved in Process Elongation of Oligodendroglial Precursor-  
873 like Cells. *J. Biol. Chem.* **281**, 30857–30864.
- 874 **Ivaska, J., Reunanen, H., Westermarck, J., Koivisto, L., Kähäri, V.-M. and Heino, J.** (1999).  
875 Integrin  $\alpha 2\beta 1$  Mediates Isoform-Specific Activation of p38 and Upregulation of Collagen  
876 Gene Transcription by a Mechanism Involving the  $\alpha 2$  Cytoplasmic Tail. *J. Cell Biol.* **147**,  
877 401–416.
- 878 **Ivaska, J., Nissinen, L., Immonen, N., Eriksson, J. E., Kähäri, V.-M. and Heino, J.** (2002).  
879 Integrin  $\alpha 2\beta 1$  Promotes Activation of Protein Phosphatase 2A and Dephosphorylation of  
880 Akt and Glycogen Synthase Kinase 3 $\beta$ . *Mol. Cell. Biol.* **22**, 1352–1359.
- 881 **Iwasaki, W., Nagata, K., Hatanaka, H., Inui, T., Kimura, T., Muramatsu, T., Yoshida, K.,  
882 Tasumi, M. and Inagaki, F.** (1997). Solution structure of midkine, a new heparin-binding  
883 growth factor. *EMBO J.* **16**, 6936–6946.
- 884 **Jochheim-Richter, A., Rüdric, U., Koczan, D., Hillemann, T., Tewes, S., Petry, M., Kispert,  
885 A., Sharma, A. D., Attaran, F., Manns, M. P., et al.** (2006). Gene expression analysis  
886 identifies novel genes participating in early murine liver development and adult liver  
887 regeneration. *Differentiation* **74**, 167–173.
- 888 **Kang, H. C., Kim, I.-J., Park, J.-H., Shin, Y., Ku, J.-L., Jung, M. S., Yoo, B. C., Kim, H. K.  
889 and Park, J.-G.** (2004). Identification of Genes with Differential Expression in Acquired

- 890 Drug-Resistant Gastric Cancer Cells Using High-Density Oligonucleotide Microarrays.  
891 *Clin. Cancer Res.* **10**, 272–284.
- 892 **Karl, M. O., Hayes, S., Nelson, B. R., Tan, K., Buckingham, B. and Reh, T. A.** (2008a).  
893 Stimulation of neural regeneration in the mouse retina. *Proc Natl Acad Sci U A* **105**,  
894 19508–13.
- 895 **Karl, M. O., Hayes, S., Nelson, B. R., Tan, K., Buckingham, B. and Reh, T. A.** (2008b).  
896 Stimulation of neural regeneration in the mouse retina. *Proc. Natl. Acad. Sci.* **105**,  
897 19508–19513.
- 898 **Kawachi, H., Fujikawa, A., Maeda, N. and Noda, M.** (2001). Identification of GIT1/Cat-1 as a  
899 substrate molecule of protein tyrosine phosphatase  $\zeta/\beta$  by the yeast substrate-trapping  
900 system. *Proc. Natl. Acad. Sci. U. S. A.* **98**, 6593–6598.
- 901 **Kikuchi-Horie, K., Kawakami, E., Kamata, M., Wada, M., Hu, J.-G., Nakagawa, H., Ohara,**  
902 **K., Watabe, K. and Oyanagi, K.** (2004). Distinctive expression of midkine in the repair  
903 period of rat brain during neurogenesis: Immunohistochemical and immunoelectron  
904 microscopic observations. *J. Neurosci. Res.* **75**, 678–687.
- 905 **Kilpeläinen, I., Kaksonen, M., Kinnunen, S, Tarja, Avikainen, H., Fath, M., Linhardt, R. J.,**  
906 **Raulo, E. and Rauvala, H.** (2000). Heparin-binding Growth-associated Molecule  
907 Contains Two Heparin-binding  $\beta$ -Sheet Domains That Are Homologous to the  
908 Thrombospondin Type I Repeat. *J. Biol. Chem.* **275**, 13564–13570.
- 909 **Kim, S.-M., Kwon, M. S., Park, C. S., Choi, K.-R., Chun, J.-S., Ahn, J. and Song, W. K.**  
910 (2004). Modulation of Thr Phosphorylation of Integrin  $\beta$ 1 during Muscle Differentiation. *J.*  
911 *Biol. Chem.* **279**, 7082–7090.
- 912 **Kojima, T., Katsumi, A., Yamazaki, T., Muramatsu, T., Nagasaka, T., Ohsumi, K. and Saito,**  
913 **H.** (1996). Human Ryudocan from Endothelium-like Cells Binds Basic Fibroblast Growth  
914 Factor, Midkine, and Tissue Factor Pathway Inhibitor. *J. Biol. Chem.* **271**, 5914–5920.
- 915 **Kuboyama, K., Fujikawa, A., Suzuki, R. and Noda, M.** (2015). Inactivation of Protein Tyrosine  
916 Phosphatase Receptor Type Z by Pleiotrophin Promotes Remyelination through  
917 Activation of Differentiation of Oligodendrocyte Precursor Cells. *J. Neurosci.* **35**, 12162–  
918 12171.
- 919 **Kumar, R., Gururaj, A. E. and Barnes, C. J.** (2006). p21-activated kinases in cancer. *Nat. Rev.*  
920 *Cancer* **6**, 459.
- 921 **Kurosawa, N., Chen, G.-Y., Kadomatsu, K., Ikematsu, S., Sakuma, S. and Muramatsu, T.**  
922 (2001). Glypican-2 binds to midkine: The role of glypican-2 in neuronal cell adhesion and  
923 neurite outgrowth. *Glycoconj. J.* **18**, 499–507.
- 924 **Liu, Y., Beyer, A. and Aebersold, R.** (2016). On the Dependency of Cellular Protein Levels on  
925 mRNA Abundance. *Cell* **165**, 535–550.
- 926 **Luo, J., Uribe, R. A., Hayton, S., Calinescu, A.-A., Gross, J. M. and Hitchcock, P. F.** (2012).  
927 Midkine-A functions upstream of Id2a to regulate cell cycle kinetics in the developing  
928 vertebrate retina. *Neural Develop.* **7**, 33.

- 929 **Maeda, N., Ichihara-Tanaka, K., Kimura, T., Kadomatsu, K., Muramatsu, T. and Noda, M.**  
930 (1999). A Receptor-like Protein-tyrosine Phosphatase PTP $\zeta$ /RPTP $\beta$  Binds a Heparin-  
931 binding Growth Factor Midkine INVOLVEMENT OF ARGININE 78 OF MIDKINE IN THE  
932 HIGH AFFINITY BINDING TO PTP $\zeta$ . *J. Biol. Chem.* **274**, 12474–12479.
- 933 **Martin, K., Pritchett, J., Llewellyn, J., Mullan, A. F., Athwal, V. S., Dobie, R., Harvey, E.,**  
934 **Zeef, L., Farrow, S., Streuli, C., et al.** (2016). PAK proteins and YAP-1 signalling  
935 downstream of integrin beta-1 in myofibroblasts promote liver fibrosis. *Nat. Commun.* **7**,  
936 1–11.
- 937 **Mashima, T., Sato, S., Sugimoto, Y., Tsuruo, T. and Seimiya, H.** (2009). Promotion of glioma  
938 cell survival by acyl-CoA synthetase 5 under extracellular acidosis conditions. *Oncogene*  
939 **28**, 9–19.
- 940 **Masui, M., Okui, T., Shimo, T., Takabatake, K., Fukazawa, T., Matsumoto, K., Kurio, N.,**  
941 **Ibaragi, S., Naomoto, Y., Nagatsuka, H., et al.** (2016). Novel Midkine Inhibitor iMDK  
942 Inhibits Tumor Growth and Angiogenesis in Oral Squamous Cell Carcinoma. *Anticancer*  
943 *Res.* **36**, 2775–2781.
- 944 **Mirkin, B. L., Clark, S., Zheng, X., Chu, F., White, B. D., Greene, M. and Rebbaa, A.** (2005).  
945 Identification of midkine as a mediator for intercellular transfer of drug resistance.  
946 *Oncogene* **24**, 4965.
- 947 **Mitsiadis, T. A., Salmivirta, M., Muramatsu, T., Muramatsu, H., Rauvala, H., Lehtonen, E.,**  
948 **Jalkanen, M. and Thesleff, I.** (1995). Expression of the heparin-binding cytokines,  
949 midkine (MK) and HB-GAM (pleiotrophin) is associated with epithelial-mesenchymal  
950 interactions during fetal development and organogenesis. *Development* **121**, 37–51.
- 951 **Miyashiro, M., Kadomatsu, K., Ogata, N., Yamamoto, C., Takahashi, K., Uyama, M.,**  
952 **Muramatsu, H. and Muramatsu, T.** (1998). Midkine expression in transient retinal  
953 ischemia in the rat. *Curr. Eye Res.* **17**, 9–13.
- 954 **Mulrooney, J., Foley, K., Vineberg, S., Barreuther, M. and Grabel, L.** (2000).  
955 Phosphorylation of the  $\beta 1$  Integrin Cytoplasmic Domain: Toward an Understanding of  
956 Function and Mechanism. *Exp. Cell Res.* **258**, 332–341.
- 957 **Muramatsu, T.** (2002). Midkine and pleiotrophin: two related proteins involved in development,  
958 survival, inflammation and tumorigenesis. *J Biochem* **132**, 359–71.
- 959 **Muramatsu, H., Zou, K., Sakaguchi, N., Ikematsu, S., Sakuma, S. and Muramatsu, T.**  
960 (2000). LDL Receptor-Related Protein as a Component of the Midkine Receptor.  
961 *Biochem. Biophys. Res. Commun.* **270**, 936–941.
- 962 **Muramatsu, H., Zou, P., Suzuki, H., Oda, Y., Chen, G.-Y., Sakaguchi, N., Sakuma, S.,**  
963 **Maeda, N., Noda, M., Takada, Y., et al.** (2004).  $\alpha 4\beta 1$ - and  $\alpha 6\beta 1$ -integrins are functional  
964 receptors for midkine, a heparin-binding growth factor. *J. Cell Sci.* **117**, 5405–5415.
- 965 **Nagashima, M., D’Cruz, T. S., Danku, A. E., Hesse, D., Sifuentes, C., Raymond, P. A. and**  
966 **Hitchcock, P. F.** (2019). Midkine-a is required for cell cycle progression of Müller glia  
967 glia during neuronal regeneration in the vertebrate retina. *J. Neurosci.*

- 968 **Nakanishi, T., Kadomatsu, K., Okamoto, T., Ichihara-Tanaka, K., Kojima, T., Saito, H.,**  
969 **Tomoda, Y. and Muramatsu, T.** (1997). Expression of Syndecan-1 and -3 during  
970 Embryogenesis of the Central Nervous System in Relation to Binding with Midkine. *J.*  
971 *Biochem. (Tokyo)* **121**, 197–205.
- 972 **Obama, H., Biro, S., Tashiro, T., Tsutsui, J., Ozawa, M., Yoshida, H., Tanaka, H. and**  
973 **Muramatsu, T.** (1998). Myocardial infarction induces expression of midkine, a heparin-  
974 binding growth factor with reparative activity. *Anticancer Res.* **18**, 145–152.
- 975 **Ooto, S., Akagi, T., Kageyama, R., Akita, J., Mandai, M., Honda, Y. and Takahashi, M.**  
976 (2004). Potential for neural regeneration after neurotoxic injury in the adult mammalian  
977 retina. *Proc Natl Acad Sci U A* **101**, 13654–9.
- 978 **Palazzo, I., Deistler, K., Hoang, T. V., Blackshaw, S. and Fischer, A. J.** (2020). NF- $\kappa$ B  
979 signaling regulates the formation of proliferating Müller glia-derived progenitor cells in  
980 the avian retina. *Development*.
- 981 **Pollak, J., Wilken, M. S., Ueki, Y., Cox, K. E., Sullivan, J. M., Taylor, R. J., Levine, E. M. and**  
982 **Reh, T. A.** (2013). ASCL1 reprograms mouse Müller glia into neurogenic retinal  
983 progenitors. *Dev. Camb. Engl.* **140**, 2619–2631.
- 984 **Qi, M., Ikematsu, S., Maeda, N., Ichihara-Tanaka, K., Sakuma, S., Noda, M., Muramatsu, T.**  
985 **and Kadomatsu, K.** (2001). Haptotactic Migration Induced by Midkine INVOLVEMENT  
986 OF PROTEIN-TYROSINE PHOSPHATASE  $\zeta$ , MITOGEN-ACTIVATED PROTEIN  
987 KINASE, AND PHOSPHATIDYLINOSITOL 3-KINASE. *J. Biol. Chem.* **276**, 15868–  
988 15875.
- 989 **Qiu, X., Hill, A., Packer, J., Lin, D., Ma, Y.-A. and Trapnell, C.** (2017a). Single-cell mRNA  
990 quantification and differential analysis with Census. *Nat. Methods* **14**, 309–315.
- 991 **Qiu, X., Mao, Q., Tang, Y., Wang, L., Chawla, R., Pliner, H. A. and Trapnell, C.** (2017b).  
992 Reversed graph embedding resolves complex single-cell trajectories. *Nat. Methods* **14**,  
993 979–982.
- 994 **Raulo, E., Chernousov, M. A., Carey, D. J., Nolo, R. and Rauvala, H.** (1994). Isolation of a  
995 neuronal cell surface receptor of heparin binding growth-associated molecule (HB-  
996 GAM). Identification as N-syndecan (syndecan-3). *J. Biol. Chem.* **269**, 12999–13004.
- 997 **Raymond, P. A.** (1991). Retinal regeneration in teleost fish. *Ciba Found Symp* **160**, 171–86;  
998 discussion 186-91.
- 999 **Reiff, T., Huber, L., Kramer, M., Delattre, O., Janoueix-Lerosey, I. and Rohrer, H.** (2011).  
1000 Midkine and Alk signaling in sympathetic neuron proliferation and neuroblastoma  
1001 predisposition. *Development* **138**, 4699–4708.
- 1002 **Reynolds, P. R., Mucenski, M. L., Cras, T. D. L., Nichols, W. C. and Whitsett, J. A.** (2004).  
1003 Midkine Is Regulated by Hypoxia and Causes Pulmonary Vascular Remodeling. *J. Biol.*  
1004 *Chem.* **279**, 37124–37132.
- 1005 **Sakaguchi, N., Muramatsu, H., Ichihara-Tanaka, K., Maeda, N., Noda, M., Yamamoto, T.,**  
1006 **Michikawa, M., Ikematsu, S., Sakuma, S. and Muramatsu, T.** (2003). Receptor-type



- 1007 protein tyrosine phosphatase  $\zeta$  as a component of the signaling receptor complex for  
1008 midkine-dependent survival of embryonic neurons. *Neurosci. Res.* **45**, 219–224.
- 1009 **Sakakima, H., Kamizono, T., Matsuda, F., Izumo, K., Ijiri, K. and Yoshida, Y.** (2006). Midkine  
1010 and its receptor in regenerating rat skeletal muscle after bupivacaine injection. *Acta*  
1011 *Histochem.* **108**, 357–364.
- 1012 **Salama, R. H. M., Muramatsu, H., Zou, P., Okayama, M. and Muramatsu, T.** (2006). Midkine,  
1013 a heparin-binding growth factor, produced by the host enhances metastasis of Lewis  
1014 lung carcinoma cells. *Cancer Lett.* **233**, 16–20.
- 1015 **Satija, R., Farrell, J. A., Gennert, D., Schier, A. F. and Regev, A.** (2015). Spatial  
1016 reconstruction of single-cell gene expression data. *Nat Biotechnol* **33**, 495–502.
- 1017 **Shen, X., Xi, G., Wai, C. and Clemmons, D. R.** (2015). The Coordinate Cellular Response to  
1018 Insulin-like Growth Factor-I (IGF-I) and Insulin-like Growth Factor-binding Protein-2  
1019 (IGFBP-2) Is Regulated through Vimentin Binding to Receptor Tyrosine Phosphatase  $\beta$   
1020 (RPTP $\beta$ ). *J. Biol. Chem.* **290**, 11578–11590.
- 1021 **Song, J., Zhang, J., Wang, J., Cao, Z., Wang, J., Guo, X. and Dong, W.** (2014).  $\beta$ 1 integrin  
1022 modulates tumor growth and apoptosis of human colorectal cancer. *Oncol. Rep.* **32**,  
1023 302–308.
- 1024 **Stanke, J., Moose, H. E., El-Hodiri, H. M. and Fischer, A. J.** (2010). Comparative study of  
1025 Pax2 expression in glial cells in the retina and optic nerve of birds and mammals. *J*  
1026 *Comp Neurol* **518**, 2316–33.
- 1027 **Takei, Y., Kadomatsu, K., Matsuo, S., Itoh, H., Nakazawa, K., Kubota, S. and Muramatsu,**  
1028 **T.** (2001). Antisense Oligodeoxynucleotide Targeted to Midkine, a Heparin-binding  
1029 Growth Factor, Suppresses Tumorigenicity of Mouse Rectal Carcinoma Cells. *Cancer*  
1030 *Res.* **61**, 8486–8491.
- 1031 **Takei, Y., Kadomatsu, K., Goto, T. and Muramatsu, T.** (2006). Combinational antitumor effect  
1032 of siRNA against midkine and paclitaxel on growth of human prostate cancer xenografts.  
1033 *Cancer* **107**, 864–873.
- 1034 **Thillai, K., Lam, H., Sarker, D. and Wells, C. M.** (2016). Deciphering the link between PI3K  
1035 and PAK: An opportunity to target key pathways in pancreatic cancer? *Oncotarget* **8**,  
1036 14173–14191.
- 1037 **Todd, L. and Fischer, A. J.** (2015a). Hedgehog-signaling stimulates the formation of  
1038 proliferating Müller glia-derived progenitor cells in the retina. *Development* **142**, 2610–  
1039 2622.
- 1040 **Todd, L. and Fischer, A. J.** (2015b). Hedgehog signaling stimulates the formation of  
1041 proliferating Müller glia-derived progenitor cells in the chick retina. *Dev. Camb. Engl.*  
1042 **142**, 2610–2622.
- 1043 **Todd, L., Squires, N., Suarez, L. and Fischer, A. J.** (2016). Jak/Stat signaling regulates the  
1044 proliferation and neurogenic potential of Müller glia-derived progenitor cells in the avian  
1045 retina. *Sci. Rep.* **6**,.

- 1046 **Todd, L., Palazzo, I., Squires, N., Mendonca, N. and Fischer, A. J.** (2017). BMP- and TGF $\beta$ -  
1047 signaling regulate the formation of Müller glia-derived progenitor cells in the avian retina.  
1048 *Glia* **65**, 1640–1655.
- 1049 **Todd, L., Suarez, L., Quinn, C. and Fischer, A. J.** (2018). Retinoic Acid-Signaling Regulates  
1050 the Proliferative and Neurogenic Capacity of Müller Glia-Derived Progenitor Cells in the  
1051 Avian Retina. *STEM CELLS* **36**, 392–405.
- 1052 **Trapnell, C., Roberts, A., Goff, L., Pertea, G., Kim, D., Kelley, D. R., Pimentel, H., Salzberg,  
1053 S. L., Rinn, J. L. and Pachter, L.** (2012). Differential gene and transcript expression  
1054 analysis of RNA-seq experiments with TopHat and Cufflinks. *Nat Protoc* **7**, 562–78.
- 1055 **Tsutsui, J., Uehara, K., Kadomatsu, K., Matsubara, S. and Muramatsu, T.** (1991). A new  
1056 family of heparin-binding factors: Strong conservation of midkine (MK) sequences  
1057 between the human and the mouse. *Biochem. Biophys. Res. Commun.* **176**, 792–797.
- 1058 **Tsutsui, J., Kadomatsu, K., Matsubara, S., Nakagawara, A., Hamanoue, M., Takao, S.,  
1059 Shimazu, H., Ohi, Y. and Muramatsu, T.** (1993). A New Family of Heparin-binding  
1060 Growth/Differentiation Factors: Increased Midkine Expression in Wilms' Tumor and  
1061 Other Human Carcinomas. *Cancer Res.* **53**, 1281–1285.
- 1062 **Ueki, Y., Wilken, M. S., Cox, K. E., Chipman, L., Jorstad, N., Sternhagen, K., Simic, M.,  
1063 Ullom, K., Nakafuku, M. and Reh, T. A.** (2015). Transgenic expression of the proneural  
1064 transcription factor *Ascl1* in Müller glia stimulates retinal regeneration in young mice.  
1065 *Proc. Natl. Acad. Sci.* **112**, 13717–13722.
- 1066 **Unoki, K., Ohba, N., Arimura, H., Muramatsu, H. and Muramatsu, T.** (1994). Rescue of  
1067 photoreceptors from the damaging effects of constant light by midkine, a retinoic acid-  
1068 responsive gene product. *Invest. Ophthalmol. Vis. Sci.* **35**, 4063–4068.
- 1069 **Van Rooijen, N.** (1989). The liposome-mediated macrophage 'suicide' technique. *J. Immunol.*  
1070 *Methods* **124**, 1–6.
- 1071 **van Rooijen, N.** (1992). Liposome-mediated elimination of macrophages. *Res Immunol* **143**,  
1072 215–9.
- 1073 **Wan, J. and Goldman, D.** (2016). Retina regeneration in zebrafish. *Curr. Opin. Genet. Dev.* **40**,  
1074 41–47.
- 1075 **Winkler, C. and Yao, S.** (2014). The midkine family of growth factors: diverse roles in nervous  
1076 system formation and maintenance. *Br. J. Pharmacol.* **171**, 905–912.
- 1077 **Xu, C., Zhu, S., Wu, M., Han, W. and Yu, Y.** (2014). Functional Receptors and Intracellular  
1078 Signal Pathways of Midkine (MK) and Pleiotrophin (PTN). *Biol. Pharm. Bull.* **37**, 511–  
1079 520.
- 1080 **Zelinka, C. P., Scott, M. A., Volkov, L. and Fischer, A. J.** (2012). The Reactivity, Distribution  
1081 and Abundance of Non-Astrocytic Inner Retinal Glial (NIRG) Cells Are Regulated by  
1082 Microglia, Acute Damage, and IGF1. *PLOS ONE* **7**, e44477.

- 1083 **Zelinka, C. P., Volkov, L., Goodman, Z. A., Todd, L., Palazzo, I., Bishop, W. A. and Fischer,**  
1084 **A. J.** (2016). mTor signaling is required for the formation of proliferating Müller glia-  
1085 derived progenitor cells in the chick retina. *Dev. Camb. Engl.* **143**, 1859–1873.
- 1086 **Zou, K., Muramatsu, H., Ikematsu, S., Sakuma, S., Salama, R. H. M., Shinomura, T.,**  
1087 **Kimata, K. and Muramatsu, T.** (2000). A heparin-binding growth factor, midkine, binds  
1088 to a chondroitin sulfate proteoglycan, PG-M/versican. *Eur. J. Biochem.* **267**, 4046–4053.
- 1089
- 1090

1091 **Figure legends:**

1092

1093 **Figure 1.** Expression of *MDK*, *PTN* and *CSPG5* in maturing MG in embryonic chick  
1094 retina. scRNA-seq was used to identify patterns of expression of *MDK*, *PTN* and  
1095 putative receptor *CSPG5* among embryonic retinal cells at four stages of development  
1096 (E5, E8, E12, E15). UMAP-ordered clusters of cells were identified by expression of  
1097 hallmark genes (**a,b**). A heatmap of *MDK*, *PTN* and *CSPG5* illustrates expression  
1098 profiles in different developing retinal cells (**c**). Each dot represents one cell and black  
1099 dots indicate cells with 2 or more genes expressed. The upregulation of *MDK* and *PTN*  
1100 in RPCs and maturing MG is illustrated with violin plot (**d**). The number on each violin  
1101 indicates the percentage of expressing cells. The transition from RPC to mature MG is  
1102 modelled with pseudotime ordering of cells with early RPCs to the far left and maturing  
1103 MG to the right of the pseudotime trajectory (**e**). *MDK* and *PTN* are up-regulated in MG  
1104 during maturation as illustrated by the pseudotime heatmap (**f**) and pseudotime plot (**g**).  
1105 Significant difference (\* $p < 0.01$ , \*\* $p < 0.0001$ , \*\*\* $p < 0.0001$ ) was determined by using a  
1106 Wilcoxon rank sum with Bonferoni correction. RPC – retinal progenitor cell, MG – Müller  
1107 glia, iMG – immature Müller glia, mMG - mature Müller glia.

1108

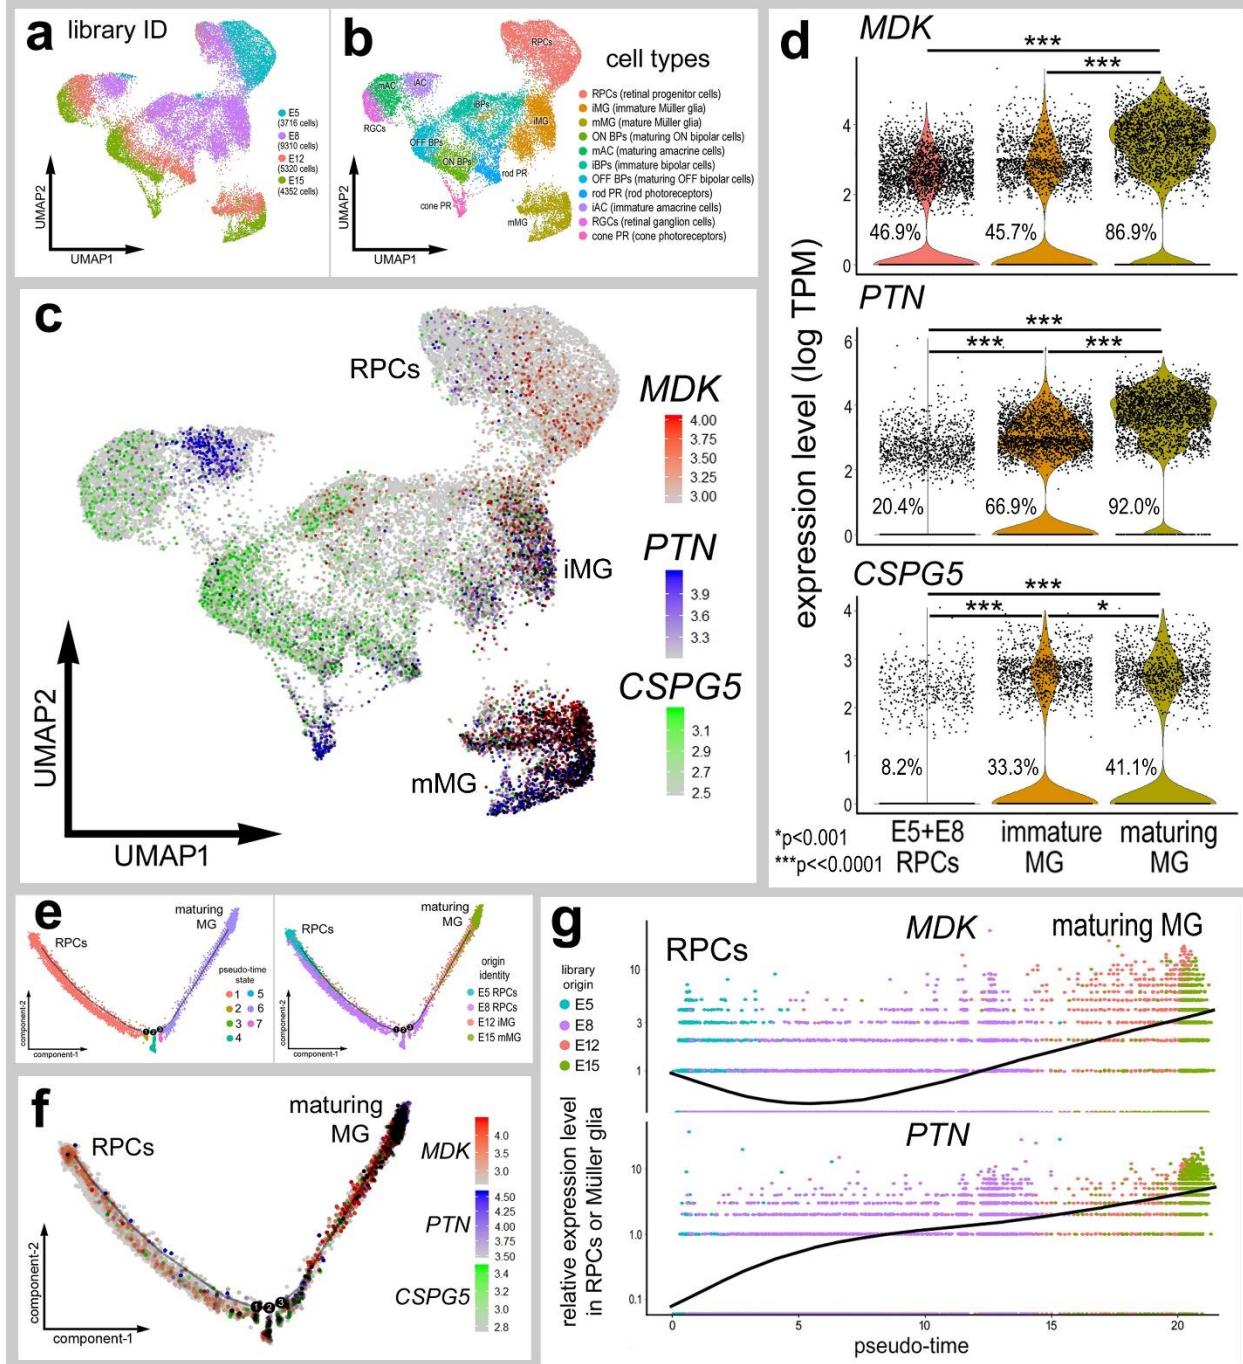

1109

1110

1111 **Figure 2.** The expression profile of *MDK*, *PTN* and putative receptors in mature retinal  
1112 cells and following acute injury. scRNA-seq was used to identify patterns of expression  
1113 of MDK-related genes among acutely dissociated retinal cells with the data presented in  
1114 UMAP plots (**a-d, f, g, h**) and violin plots (**e,i**). Control and treated scRNA-seq libraries  
1115 were aggregated from 24hr, 48hr, and 72hr after NMDA-treatment (**a**). UMAP-ordered  
1116 cells formed distinct clusters with MG and MGPCs forming distinct clusters (**b**).  
1117 Expression heatmaps of *MDK*, *PTN*, and receptor genes *PTPRZ1*, *CSPG5*, and *SDC4*  
1118 demonstrate patterns of expression in the retina, with black dots representing cells with  
1119 2 or more genes (**c,d**). In addition to NMDA, retinas were treated with insulin and FGF2  
1120 and expression levels of *MDK*, *PTN*, and *CSPG5* were assessed in MG and MGPCs (**f-**  
1121 **i**). UMAP and violin plots illustrate relative levels of expression in MG and MGPCs  
1122 treated with NMDA alone or NMDA plus insulin and FGF2 (**h,i**). Violin plots illustrate  
1123 levels of gene expression and significant changes (\* $p < 0.1$ , \*\* $p < 0.0001$ , \*\*\* $p < 0.0001$ ) in  
1124 levels were determined by using a Wilcox rank sum with Bonferoni correction. The  
1125 number on each violin indicates the percentage of expressing cells.

1126

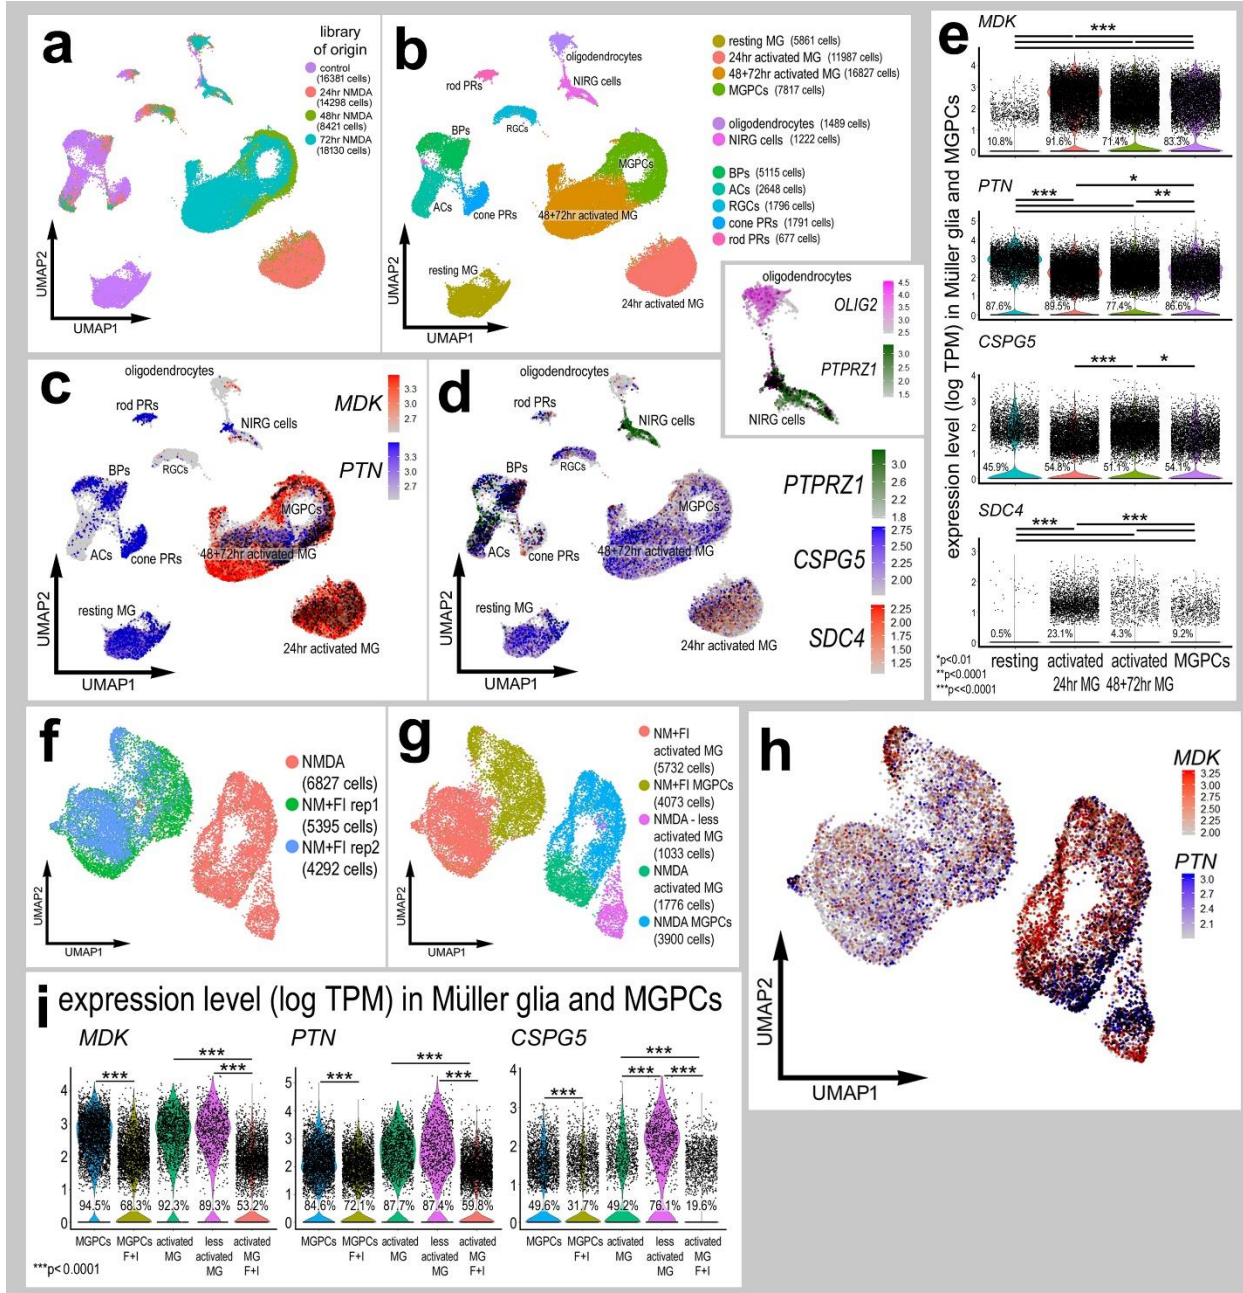

1127

1128

1129 **Figure 3.** MDK activates cell-signaling in MG in the chick retina. A single intraocular  
1130 injection of MDK was delivered and retinas were harvested 4 hours later. The  
1131 histogram in **a** represents the mean percent change ( $\pm$ SD) in intensity sum for cFOS  
1132 and pS6 immunofluorescence. Each dot represents one biological replicate retina.  
1133 Significance of difference (\*\* $p < 0.01$ , \*\*\* $p < 0.001$ ) was determined by using a paired *t*-  
1134 test. Sections of saline (control) and MDK-treated retinas were labeled with antibodies  
1135 to cFOS (green; **b,c**), pS6 (green; **d,e**) and Sox2 (magenta; **c,e**). Arrows indicate the  
1136 nuclei of MG, small double-arrows indicate the nuclei of amacrine cells, and hollow  
1137 arrow-heads indicate the nuclei of presumptive NIRG cells. An identical paradigm with  
1138 the addition of ITGB1 inhibitors fostriecin & calyculin measured changes in pS6  
1139 signaling in MG (**f**) and was quantified for intensity changes (**g**). The calibration bar (50  
1140  $\mu$ m) in panel **d** applies to **b** and **d**. Abbreviations: ONL – outer nuclear layer, INL – inner  
1141 nuclear layer, IPL – inner plexiform layer, GCL – ganglion cell layer.  
1142



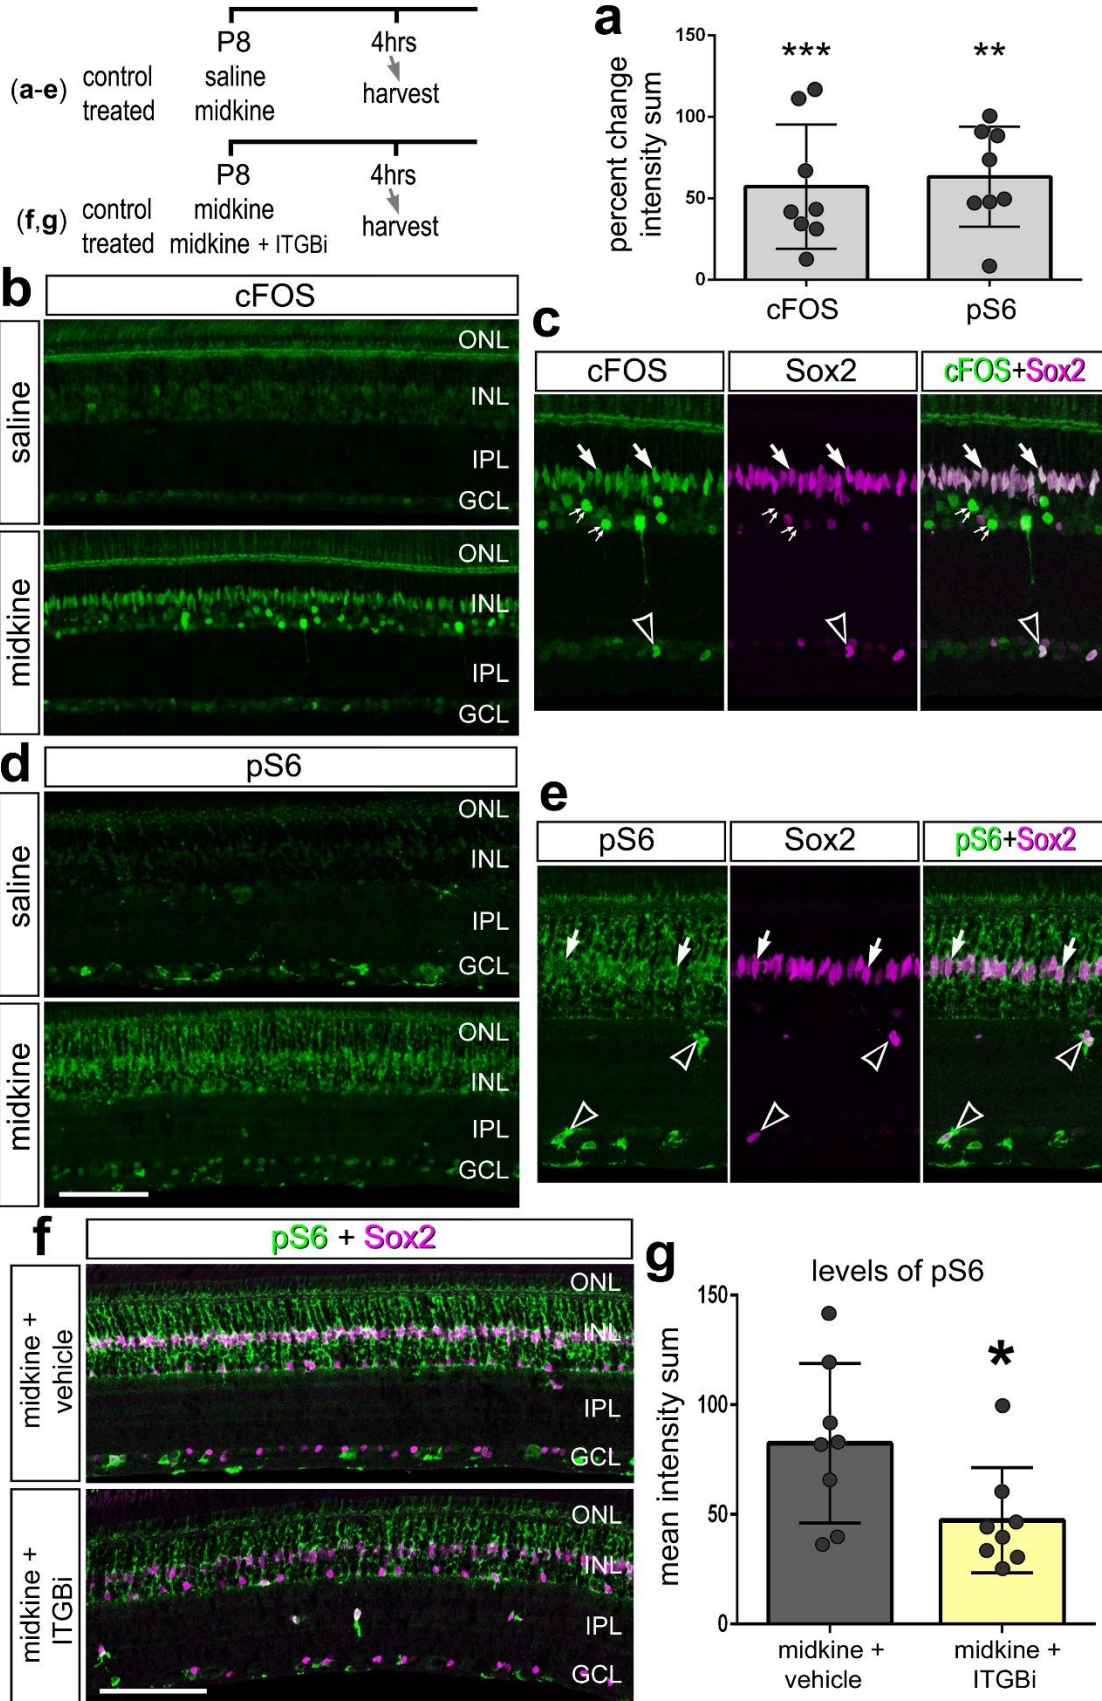

1144 **Figure 4.** MDK treatment prior to NMDA reduces numbers of proliferating MGPCs,  
1145 suppresses the accumulation of NIRG cells, and increases neuronal survival. Eyes were  
1146 injected with MDK or saline at P6 and P7, and NMDA at P8. Some retinas were  
1147 harvested at P9, whereas other eyes were injected at P10 with EdU and retinas  
1148 harvested 4hrs later, 24hrs later at P11 or 10 days later at P20. Sections of the retina  
1149 were labeled for EdU (red) and Sox9 (green; **a**), phospho-Histone H3 (pHisH3;  
1150 magenta) and Sox2 (green; **c**), Nkx2.2 (**e**), CD45 (**g**), TUNEL (**i**), and AP2 $\alpha$  (red) and  
1151 Otx2 (green) or calretinin (red; **k**). Arrows indicate nuclei of proliferating MGPCs and  
1152 hollow arrow-heads indicate TUNEL-positive cells. The histogram/scatter-plots **b**, **d**, **f**, **j**  
1153 and **l** illustrate the mean number of labeled cells ( $\pm$ SD). The histogram in **h** represents  
1154 the mean percent change ( $\pm$ SD) in density sum and area for CD45  
1155 immunofluorescence. Each dot represents one biological replicate. Significance of  
1156 difference ( $*p<0.01$ ) was determined by using a paired *t*-test. The calibration bars  
1157 panels **a**, **c**, **e**, **g**, **i** and **k** represent 50  $\mu$ m. Abbreviations: ONL – outer nuclear layer,  
1158 INL – inner nuclear layer, IPL – inner plexiform layer, GCL – ganglion cell layer.  
1159

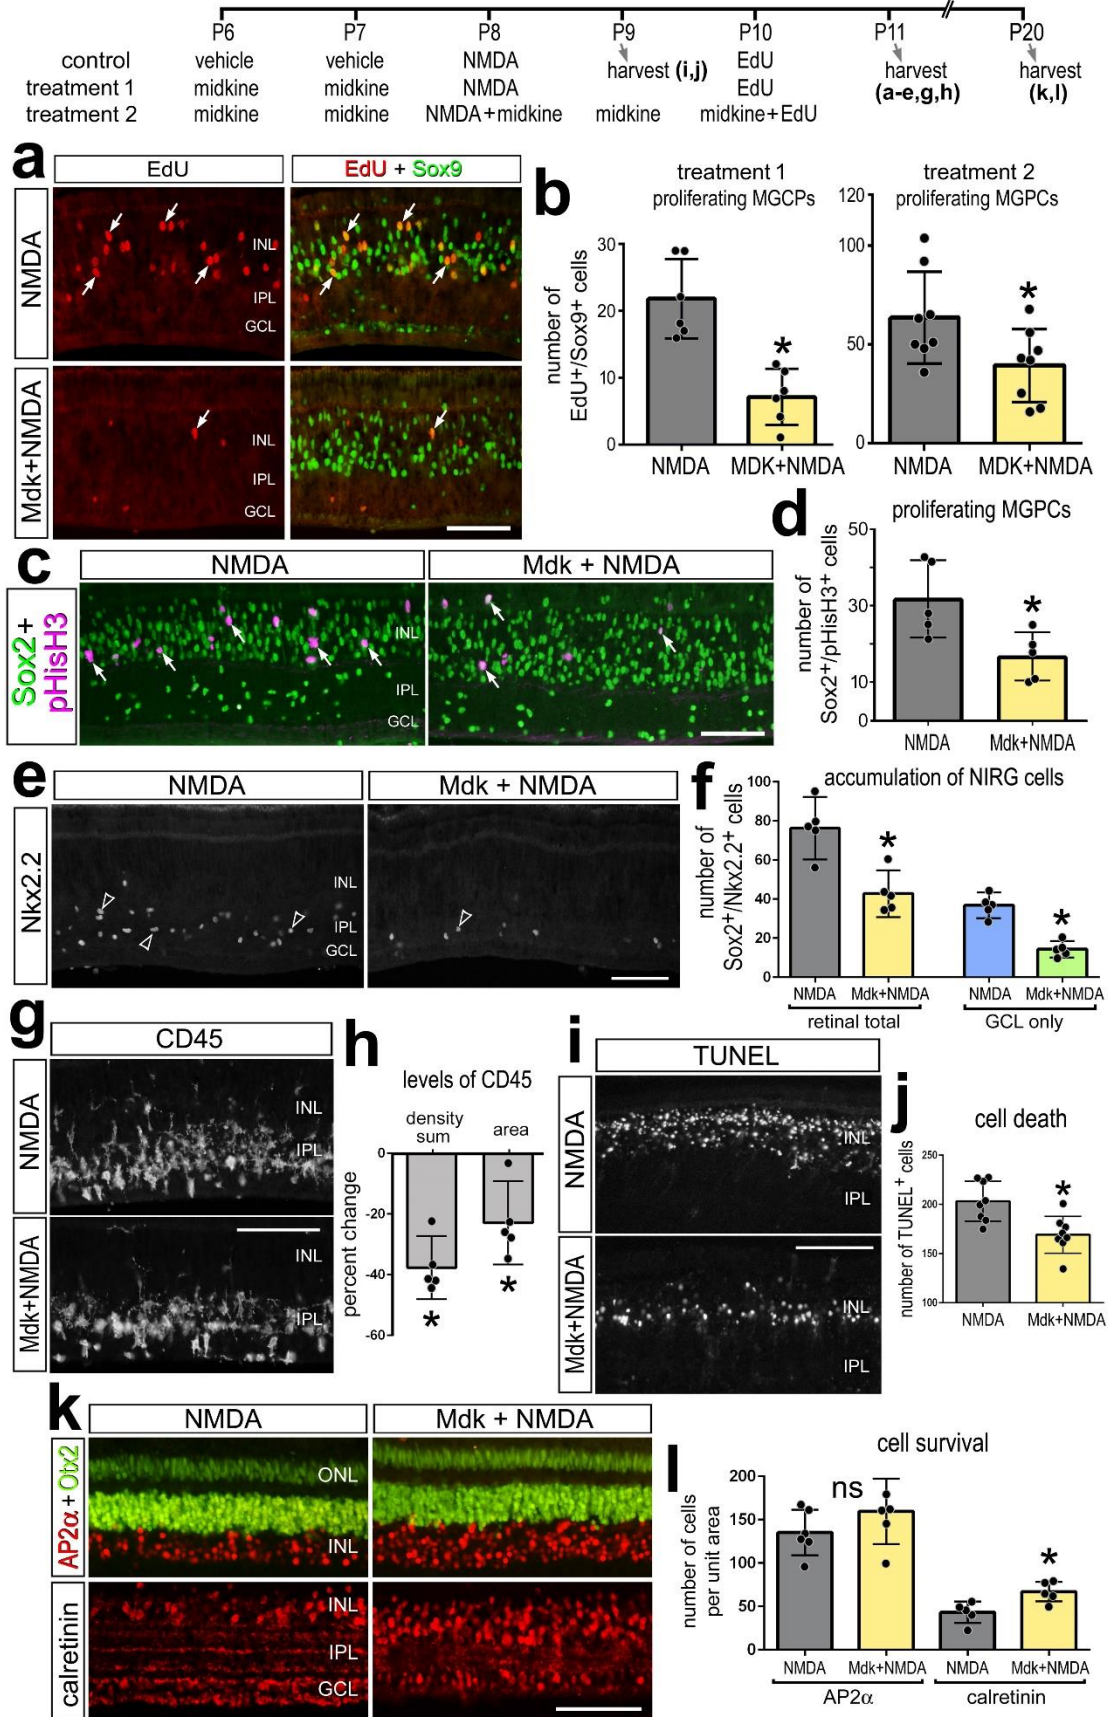

1161 **Figure 5.** Inhibition of PTPrz in NMDA-damaged retinas suppressed the formation of  
1162 MGPCs, increases numbers of dying cells, and stimulates the accumulation of NIRG  
1163 cells. Eyes were injected with NMDA and Na<sub>3</sub>VO<sub>4</sub> inhibitor or vehicle at P8, inhibitor or  
1164 vehicle at P9, EdU at P10, and retinas harvested at P11. Sections of the retina were  
1165 labeled for EdU (red) and Sox9 (green; **a, g**), Nkx2.2 and Sox9 (green; **c**), or TUNEL  
1166 (**e**). Arrows indicate nuclei of proliferating MGPCs (**a,g**) and hollow arrow-heads  
1167 indicate NIRG cells (**c**). The histogram/scatter-plots in **b, d, f, h** and **i** illustrate the  
1168 mean ( $\pm$ SD) number of labeled cells. Each dot represents one biological replicate.  
1169 Significance of difference (\* $p < 0.05$ ) was determined by using a paired *t*-test. The  
1170 calibration bars panels **a, c, e** and **g** represent 50  $\mu$ m. Abbreviations: ONL – outer  
1171 nuclear layer, INL – inner nuclear layer, IPL – inner plexiform layer, GCL – ganglion cell  
1172 layer.  
1173

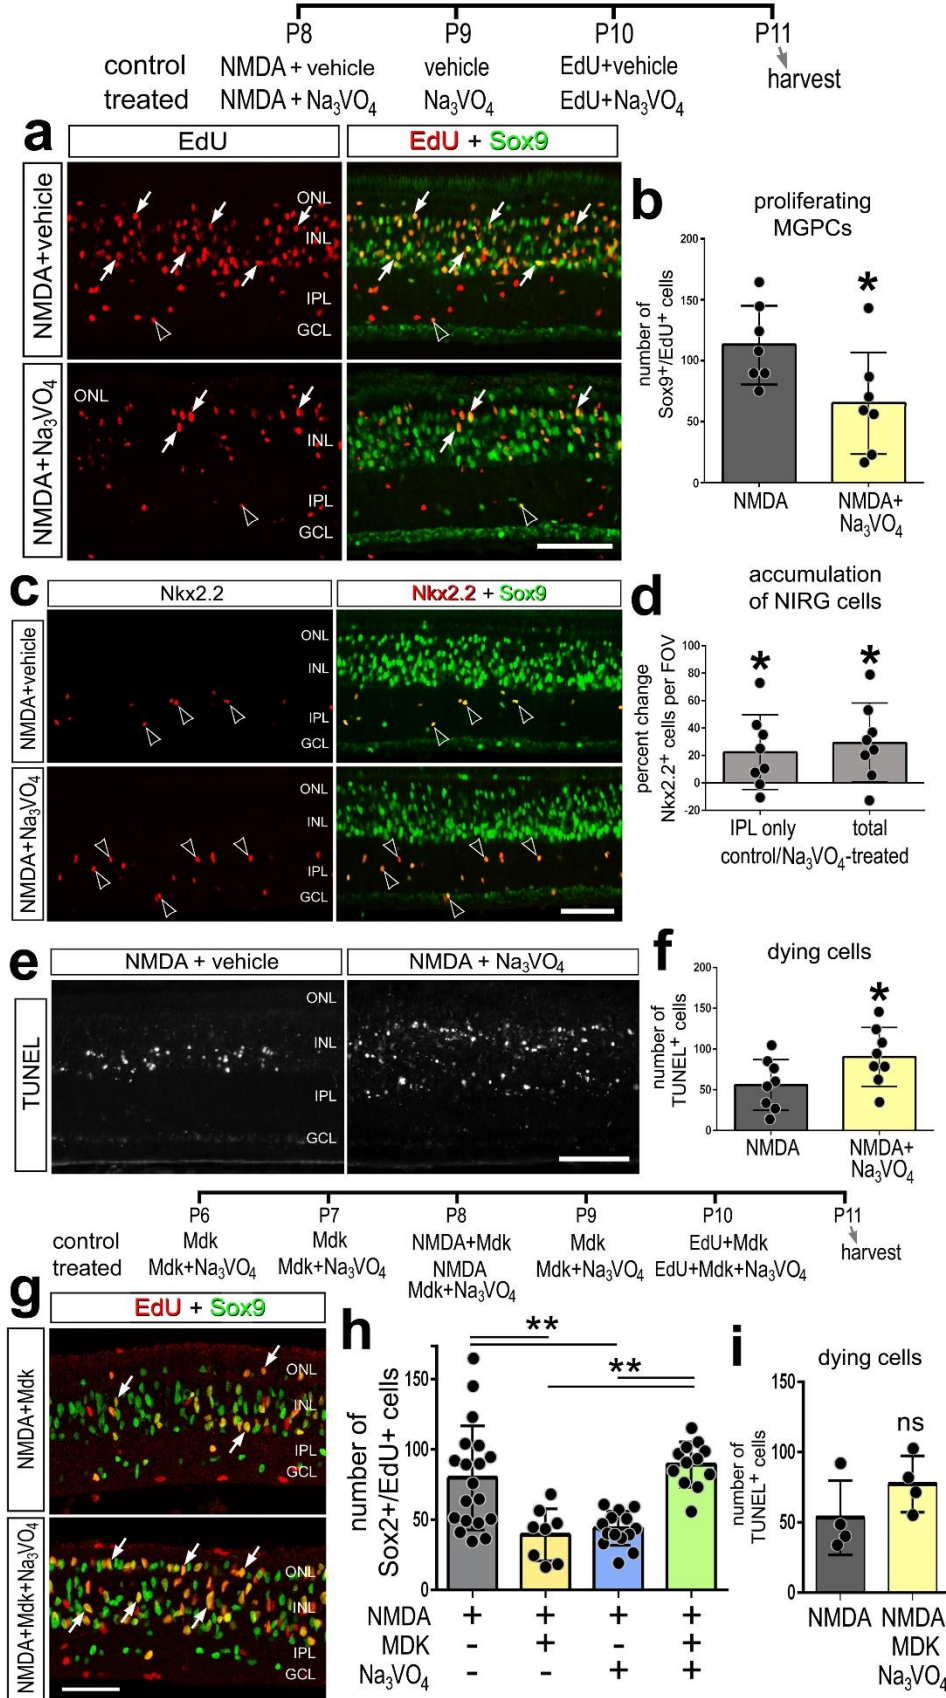

1175 **Figure 6.** Patterns of expression and inhibition of putative MDK receptors, integrins,  
1176 and signal transducers in damaged retinas. scRNA-seq libraries (Fig. 2) were probed for  
1177 patterns of expression of integrin alpha/beta isoforms and associated signaling ITGB1  
1178 molecules p21 associated kinase-1 (PAK1), protein phosphatase 2a catalytic subunit  
1179 alpha (PPP2CA), integrin linked kinase (ILK), and ARF GTPase-activating protein  
1180 (GIT1). tSNE plots demonstrate patterns of expression of *PAK1*, *ITGB1*, *ITGA1*, *ITGA2*,  
1181 *ITGA3*, *ITGA6*, *ITGAV*, *CAT*, *CDC42*, *GIT1*, *ILK* and *PPP2CA* (**a**). Violin/scatter plots  
1182 indicate significant differences (\* $p < 0.01$ , \*\* $p < 0.001$ , \*\*\* $p < 0.001$ ; Wilcoxon rank sum with  
1183 Bonferoni correction) in expression of *PAK1*, *ITGB1*, *ITGA1*, *ITGA2*, *ITGA3*, *ITGA6*,  
1184 *ITGAV*, *CAT*, *CDC42*, *GIT1*, *ILK* and *PPP2CA* among MG and MGPCs (**b**). The number  
1185 on each violin indicates the percentage of expressing cells. PAK1-specific inhibitor IPA3  
1186 was injected with and following NMDA (**c,d**) or before NMDA (**e**) and analyzed for  
1187 proliferation of MGPCs. Alternatively, PP2A-specific inhibitors calyculin A or fostriecin  
1188 were injected with and following NMDA (**f-h**). Sections of the retina were labeled for  
1189 EdU (red) and Sox9 (green; **c, f**). Arrows indicate nuclei of proliferating MGPCs (**a,g**).  
1190 The histogram/scatter-plots in **d, e, g** and **h** illustrate the mean ( $\pm$ SD) number of labeled  
1191 cells. Each dot represents one biological replicate. Significance of difference (\* $p < 0.05$ )  
1192 was determined by using a paired *t*-test. Arrows indicate nuclei of proliferating MGPCs  
1193 (**c,f**). The calibration bar panels **c** and **f** represent 50  $\mu$ m. Abbreviations: ONL – outer  
1194 nuclear layer, INL – inner nuclear layer, IPL – inner plexiform layer, GCL – ganglion cell  
1195 layer, ns – not significant.  
1196

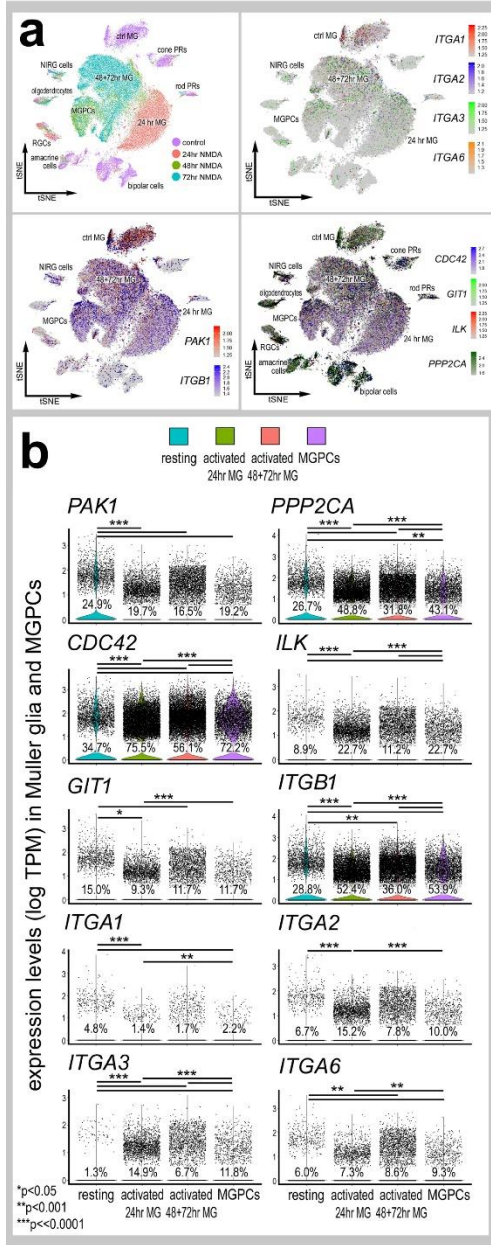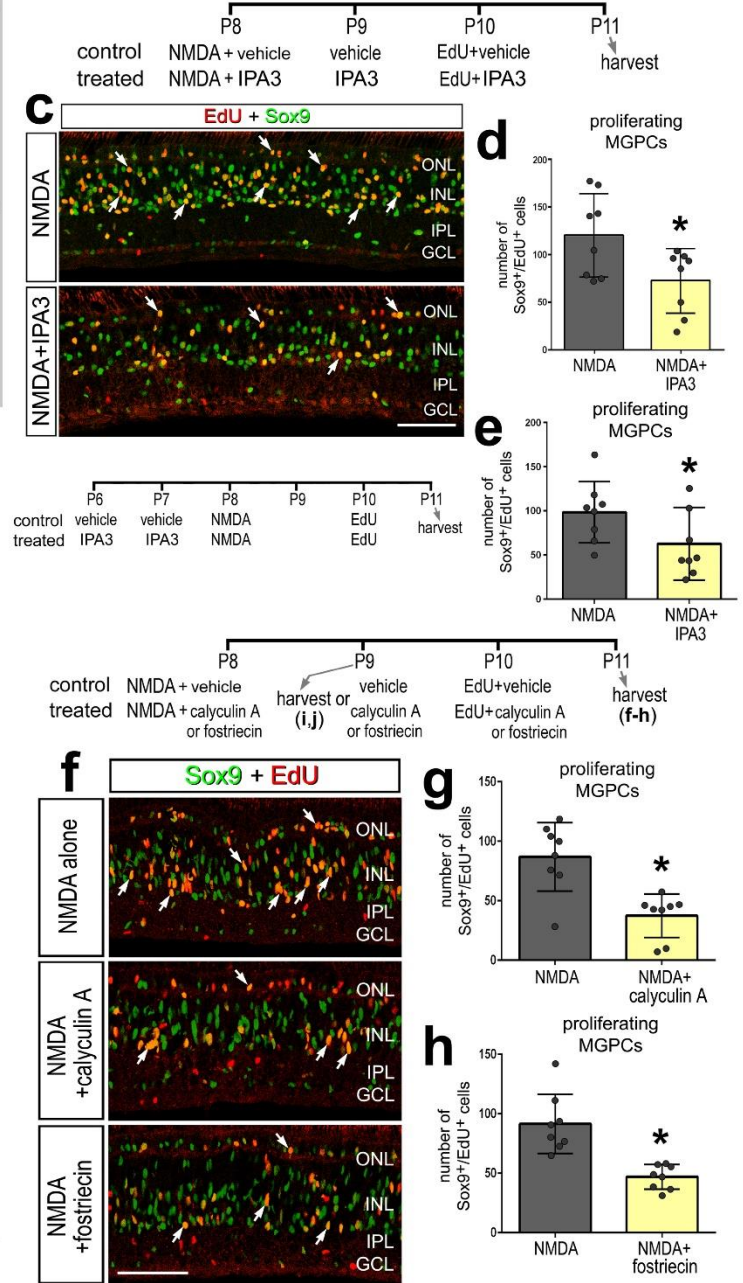

1197

1198

1199 **Figure 7.** MG expression of *MDK* and putative MDK-receptors in retinas treated with  
1200 insulin and FGF2. scRNA-seq was used to identify patterns of expression of MDK-  
1201 related genes among cells in saline-treated retinas and in retinas after 2 and 3  
1202 consecutive doses of FGF2 and insulin (**a,b**). In UMAP plots, each dot represents one  
1203 cell, and expressing cells indicated by colored heatmaps of gene expression for *MDK*,  
1204 *PTN*, *PAK1*, *CSPG5* and *ITGB1* (**c,d**). Black dots indicate cells with expression of two  
1205 or more genes. (**e**) Changes in gene expression among UMAP clusters of MG and  
1206 MGPCs are illustrated with violin plots and significance of difference (\* $p < 0.1$ ,  
1207 \*\* $p < 0.0001$ , \*\*\* $p < 0.0001$ ) determined using a Wilcoxon rank sum with Bonferroni  
1208 correction. The number on each violin indicates the percentage of expressing cells.  
1209



1210

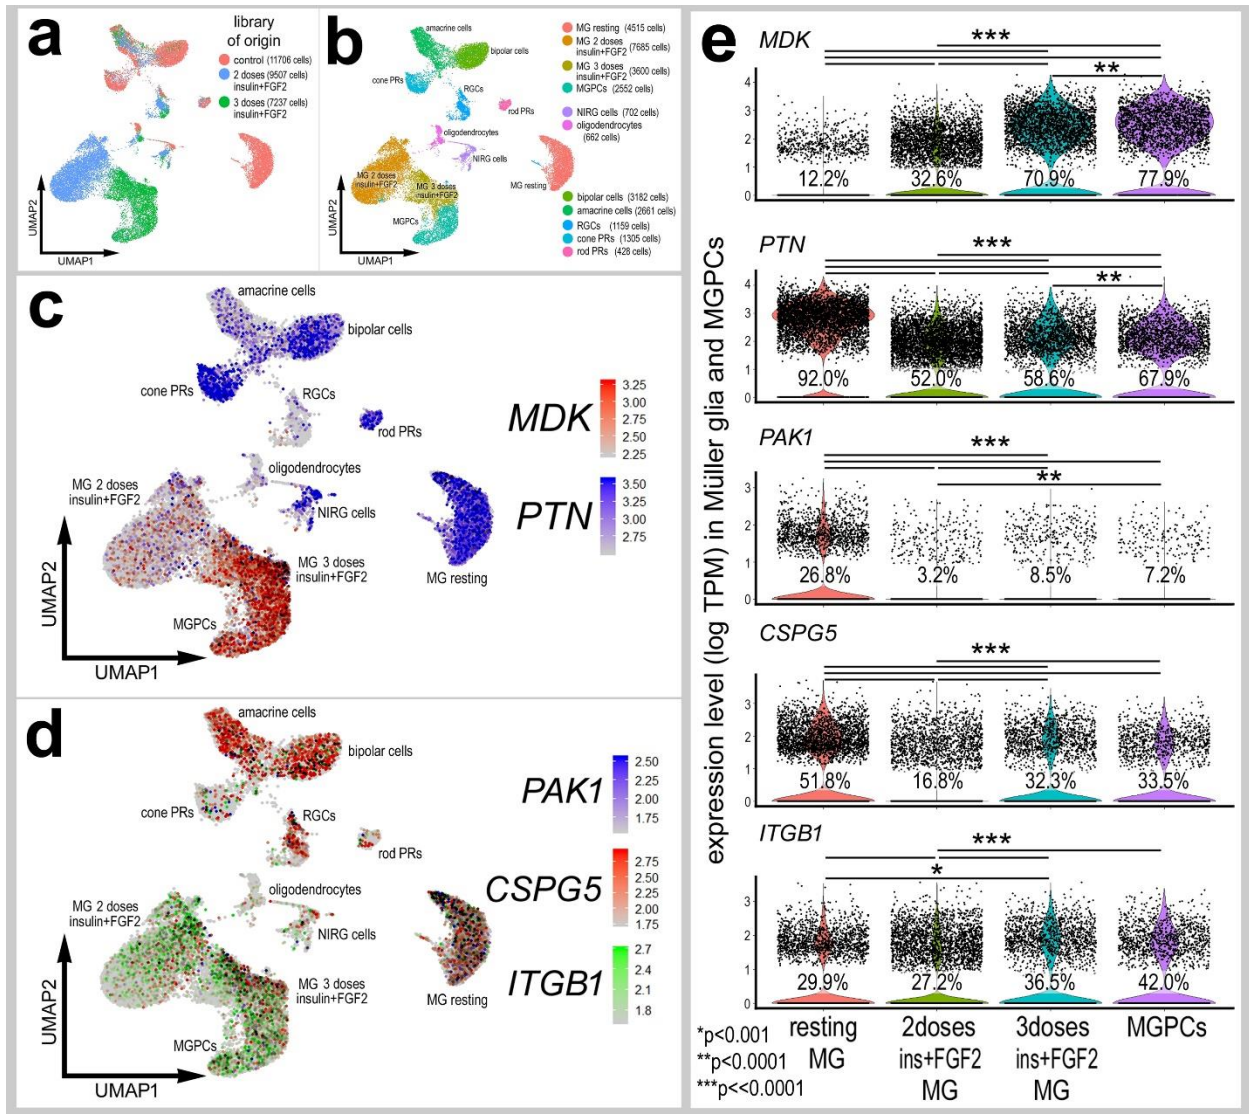

1211

1212

1213 **Figure 8.** Expression of *MDK* and MDK-related genes in aggregate of scRNA-seq  
1214 libraries for MG from different treatments. In UMAP and violin plots each dot represents  
1215 one cell. MG were bioinformatically isolated from 2 biological replicates for control  
1216 retinas and retinas treated with 2 doses of insulin and FGF2, 3 doses of insulin and  
1217 FGF2, 24 hrs after NMDA, 48 hrs after NMDA, 48hrs after NMDA + insulin and FGF2,  
1218 and 72 hrs after NMDA. UMAP analysis revealed distinct clusters of MG which includes  
1219 control/resting MG, activated MG from retinas 24hrs after NMDA treatment, activated  
1220 MG from 2 doses of insulin and FGF2, activated MG from 3 doses of insulin FGF2 and  
1221 NMDA at different times after treatment, activated MG returning toward a resting  
1222 phenotype from 48 and 72 hrs after NMDA-treatment, and 3 regions of MGPCs. The dot  
1223 plot in **c** illustrates some of the pattern-distinguishing genes and relative levels across  
1224 the different UMAP-clustered MG and MGPCs. UMAP plots illustrate the distinct and  
1225 elevated expression of *GLUL*, *RLBP*, *VIM* and *SLC1A3* in resting MG (**d**) and *CDK1*,  
1226 *TOP2A*, *PCNA* and *SPC25* in different regions of MGPCs (**e**). Violin plots in **f** illustrate  
1227 relative expression levels for *MDK*, *PTN*, *SDC4*, *PAK1*, *CSPG5*, *ITGB1*, *PPP2CA* and  
1228 *CDC4* in UMAP-clustered MG and MGPCs. Significance of difference (\*\* $p < 0.001$ ,  
1229 \*\*\* $p < 0.001$ ) was determined by using a Wilcox rank sum with Bonferoni correction.  
1230 The number on each violin indicates the percentage of expressing cells.

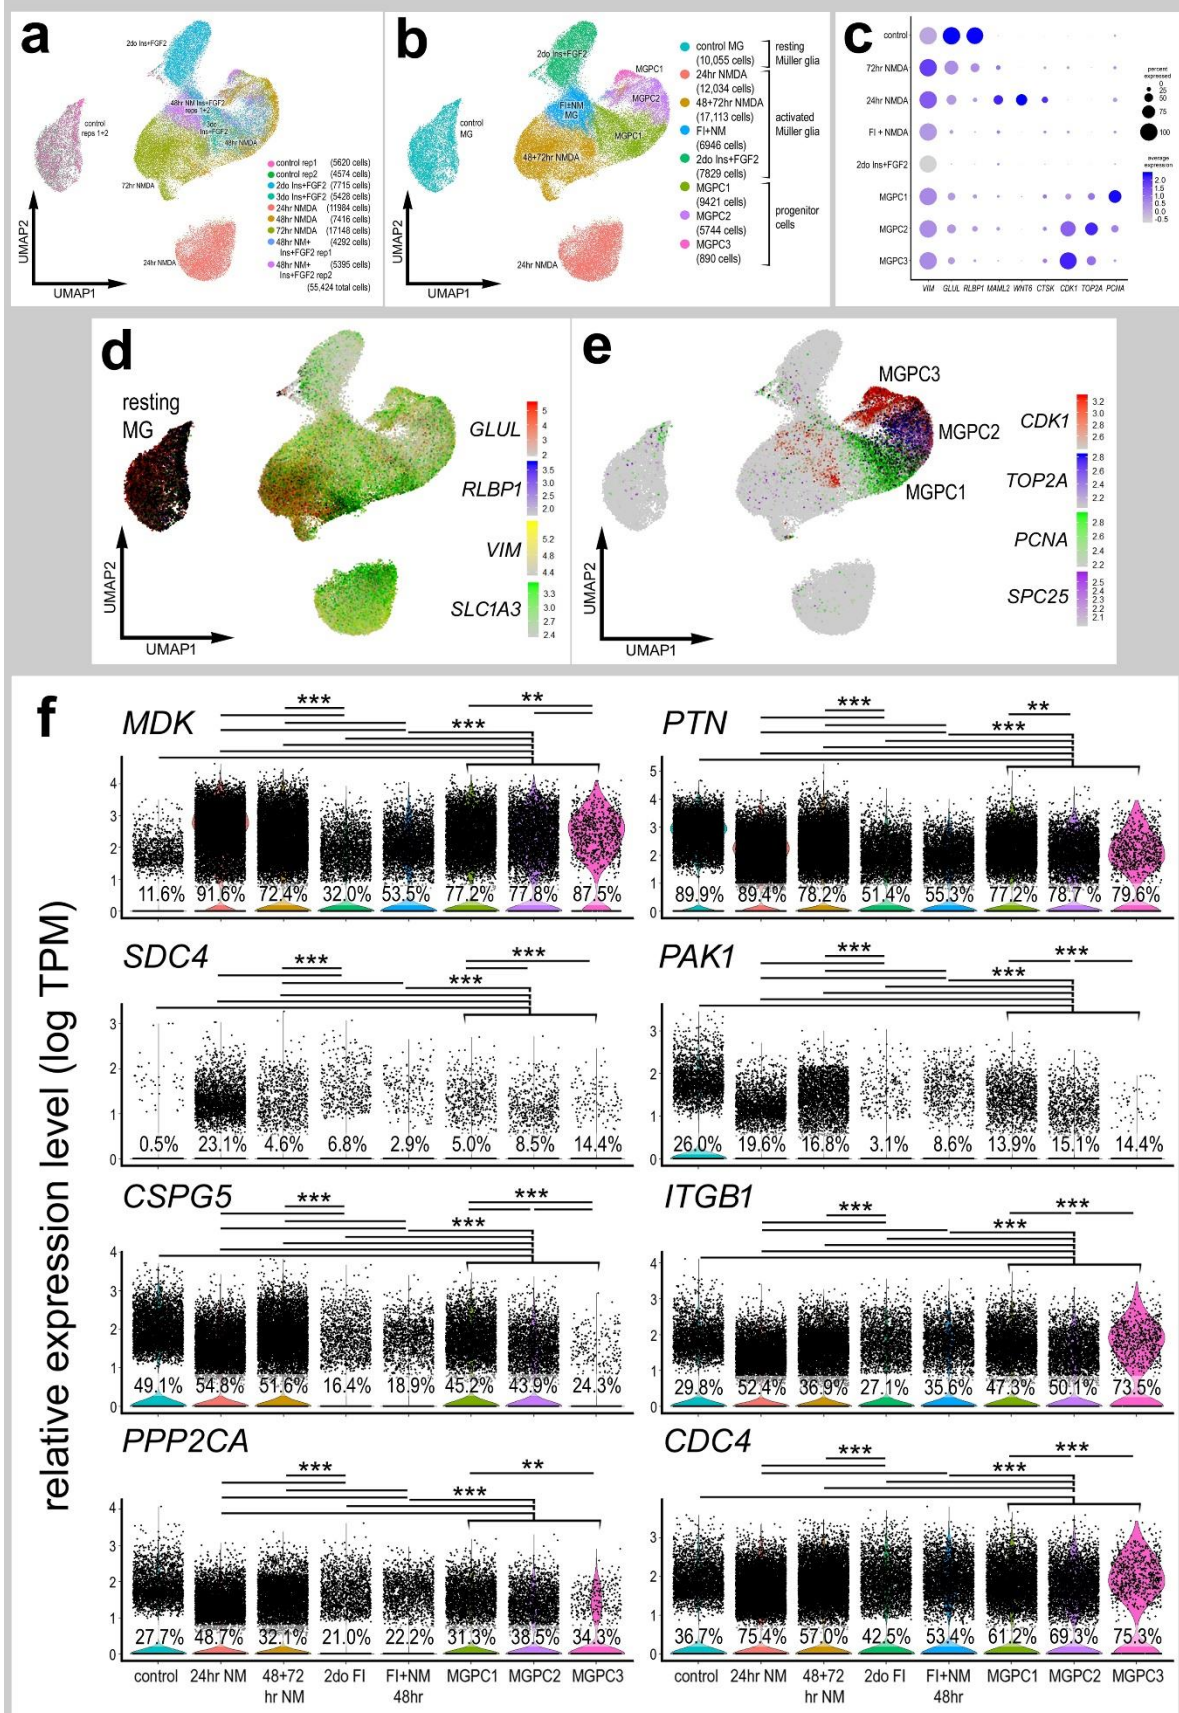

1232 **Figure 9.** The combination of MDK with FGF2 and insulin had no effect on the formation  
1233 of proliferating MGPCs. **(a-h)** Retinas were obtained from eyes that received 2  
1234 consecutive daily doses of vehicle or MDK/IPA3, 3 consecutive daily injections of FGF2  
1235 and insulin with or without MDK/IPA3, followed by an injection of EdU, and harvested 24  
1236 hrs after the final injection. **(i-j)** Alternatively, retinas were obtained from eyes that  
1237 received, 3 consecutive daily injections of FGF2 and insulin with or without NaVO<sub>4</sub>,  
1238 followed by 2 consecutive daily injections of EdU, and harvested 24 hrs after the final  
1239 injection. The responses of MG, microglia, and NIRG proliferation and accumulation  
1240 was evaluated after harvesting. Sections of the retina were labeled for EdU (red; **a**),  
1241 TUNEL(**l**) or antibodies to Sox9 (green; **a**, **j**) and Nkx2.2 (red; **j**). The histogram/scatter-  
1242 plots illustrate the mean ( $\pm$ SD) number of proliferating MGPCs, microglia, NIRG cells, or  
1243 TUNEL positive nuclei. Significance of difference (\* $p$ <0.05) was determined by using a  
1244 *t*-test. Arrows indicate EdU<sup>+</sup>/Sox9<sup>+</sup> MG, small double-arrows indicate proliferating NIRG  
1245 cells, and hollow arrow-heads indicate Sox9<sup>+</sup>/Nkx2.2<sup>+</sup> NIRG cells. The calibration bars  
1246 in panels **a** and **j** represent 50  $\mu$ m. Abbreviations: ONL – outer nuclear layer, INL – inner  
1247 nuclear layer, IPL – inner plexiform layer, GCL – ganglion cell layer.  
1248

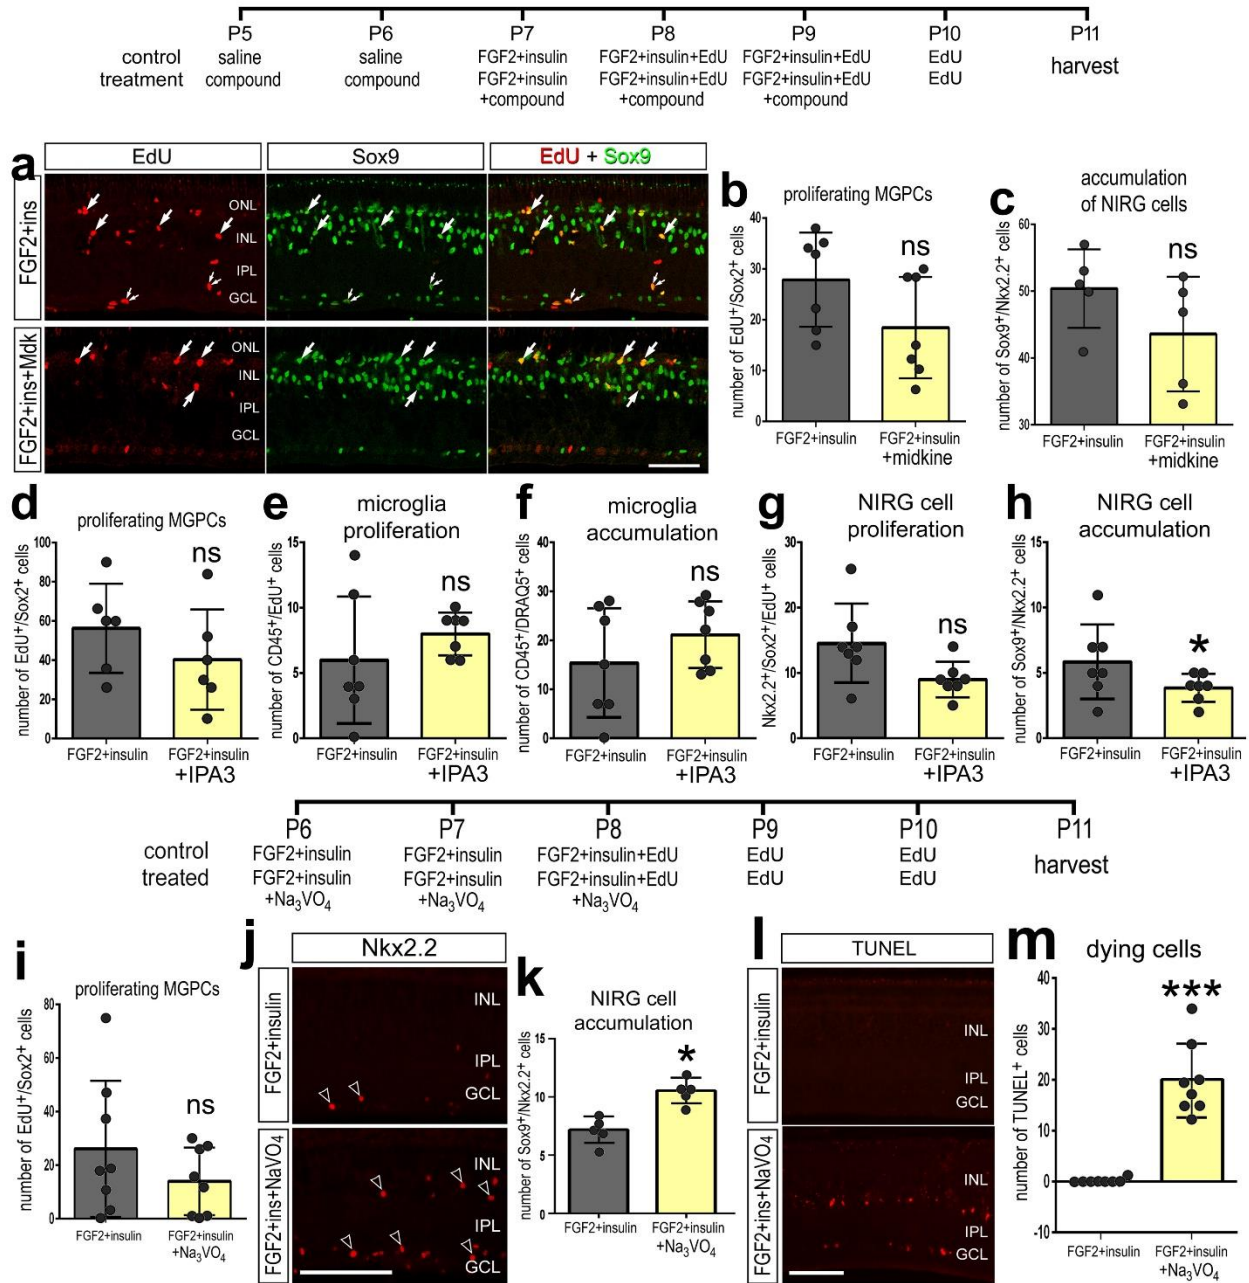

1249

1250

1251 **Figure 10.** Mouse MG have a reduced profile of *Mdk*, *Ptn* and MDK-related genes in  
1252 MG in response to NMDA damage. Cells were obtained from control retinas and from  
1253 retinas at 3, 6, 12, 24, 36, 48 and 72hrs after NMDA-treatment and clustered in UMAP  
1254 plots with each dot representing an individual cell (a). UMAP plots revealed distinct  
1255 clustering of different types of retinal cells; resting MG (a mix of control, 48hr and 72hr  
1256 NMDA-tr), 12-72 hr NMDA-tr MG (activated MG in violin plots), 6hrs NMDA-tr MG, 3hrs  
1257 NMDA-tr MG, microglia, astrocytes, RPE cells, endothelial cells, retinal ganglion cells,  
1258 horizontal cells (HCs), amacrine cells (ACs), bipolar cells (BPs), rod photoreceptors,  
1259 and cone photoreceptors (b). Cells were colored with a heatmap of expression of *Mdk*,  
1260 *Ptn*, *Sdc4*, *Pak1*, *Ptprz1*, *Cspg5*, *Itgb1bp1*, *Itga4* and *Itgba6* gene expression (c). Black  
1261 dots indicates cells with two or more markers. In MG, changes in gene expression are  
1262 illustrated with violin/scatter plots of *Mdk*, *Ptn*, *Pak1*, *Cspg5*, *Sdc4*, and *Itgb1* and  
1263 quantified for significant changes (d) (\* $p < 0.01$ , \*\* $p < 0.0001$ , \*\*\* $p < 0.001$ ). Similarly,  
1264 UMAP-clustered microglia were analyzed and genes *Itgb1* and *Itga6* were detected and  
1265 quantified in violin plots for cells from each library of origin (e). The number on each  
1266 violin indicates the percentage of expressing cells.  
1267

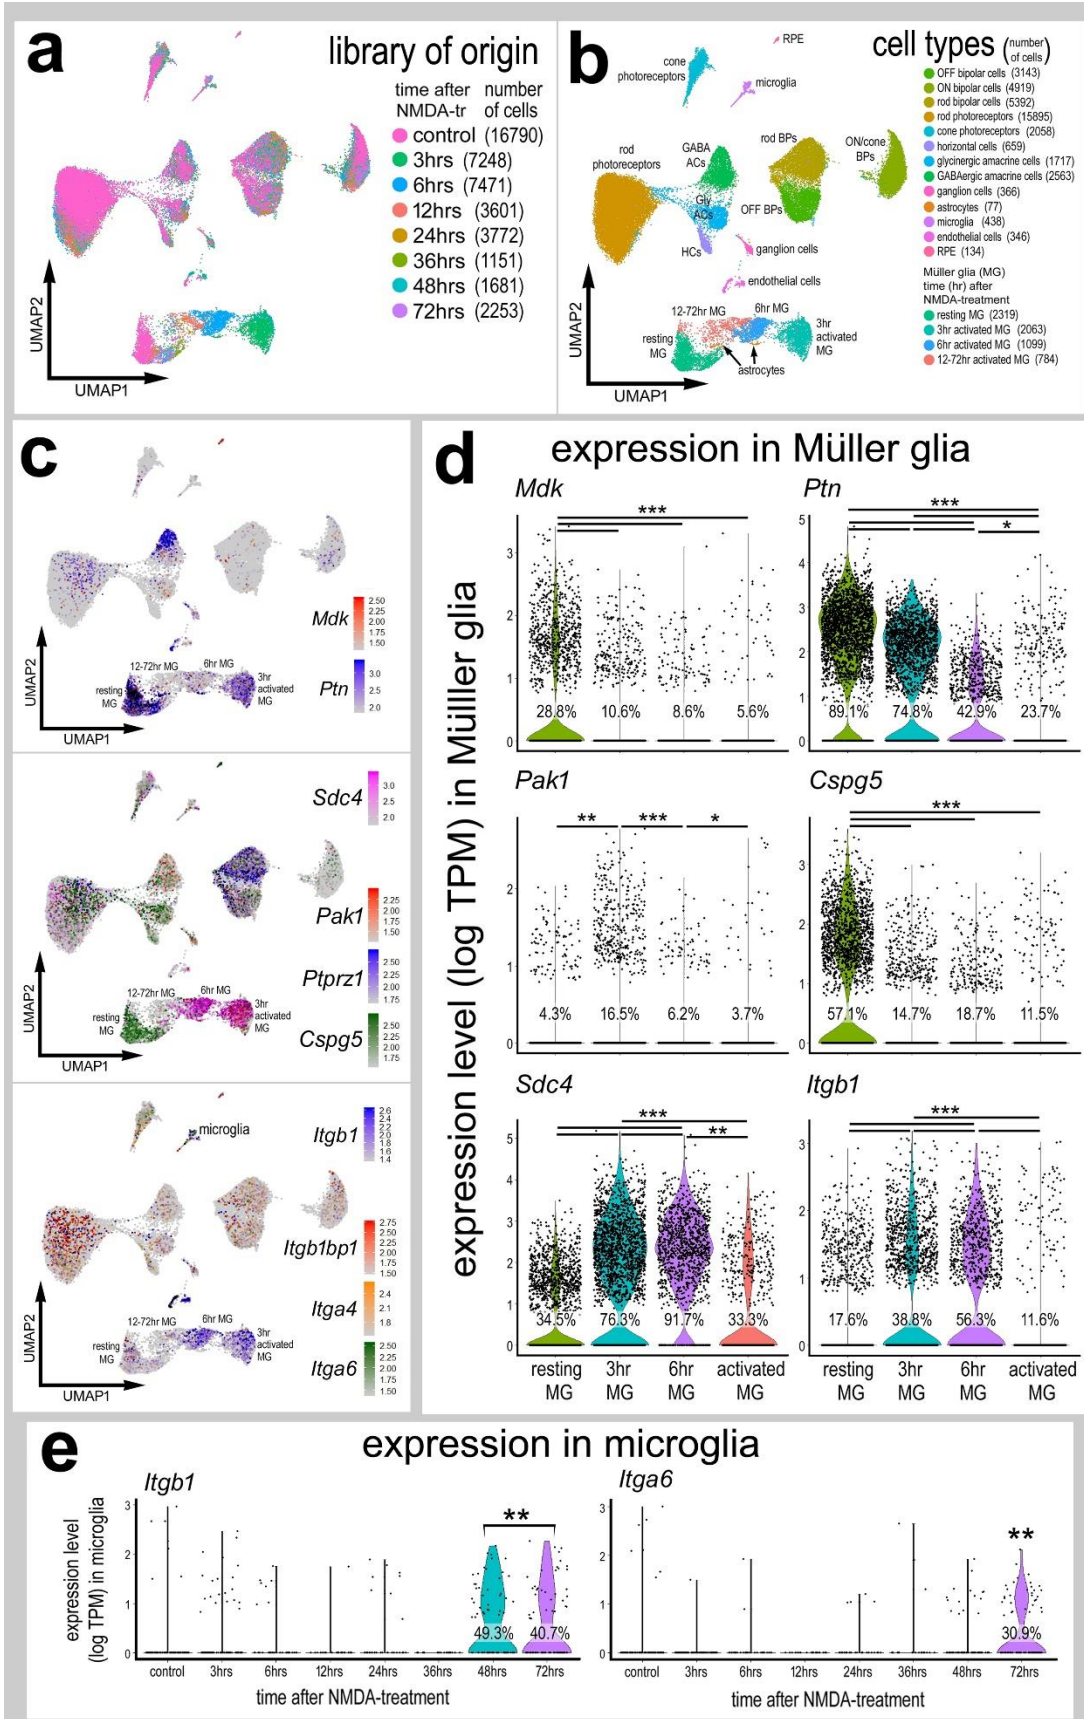

1269 **Figure 11.** MDK activates cell-signaling in MG and stimulates proliferation in the mouse  
1270 retina. **(a-e)** A single intraocular injection of MDK was delivered and retinas were  
1271 harvested 4 hours later. The histogram in **a** represents the mean percent change ( $\pm$ SD)  
1272 in density sum and area for percentage change in intensity sum for cFOS and pS6  
1273 immunofluorescence. Each dot represents one replicate retina. Significance of  
1274 difference (\*\* $p < 0.01$ , \*\*\* $p < 0.0001$ ) was determined by using a paired two-way *t*-test.  
1275 Vertical sections of saline (control) and MDK-treated retinas were labeled with  
1276 antibodies to cFOS (green; **b,c**), pS6 (green; **d,e**) and Sox2 (magenta; **c,e**). **(f-h)**  
1277 Treatment included intraocular injections of MDK or vehicle at P60, NMDA and  
1278 MDK/vehicle at P62, MDK or vehicle at P60, Edu was applied daily by intraperitoneal  
1279 (IP) injections from P62 through P66, and tissues were harvested at P67. The  
1280 histogram in **h** represents the mean ( $\pm$ SD) numbers of EdU<sup>+</sup>/Sox9<sup>+</sup> cells in the INL.  
1281 Each dot represents one replicate retina. Significance of difference (\* $p < 0.05$ ) was  
1282 determined by using a paired two-way *t*-test. Arrows indicate the nuclei of MG and  
1283 arrow-heads indicate EdU<sup>+</sup>/Sox9<sup>-</sup> cells (presumptive proliferating microglia). The  
1284 calibration bar (50  $\mu$ m) in panel **d** applies to **b** and **d**. Abbreviations: ONL – outer  
1285 nuclear layer, INL – inner nuclear layer, IPL – inner plexiform layer, GCL – ganglion cell  
1286 layer.



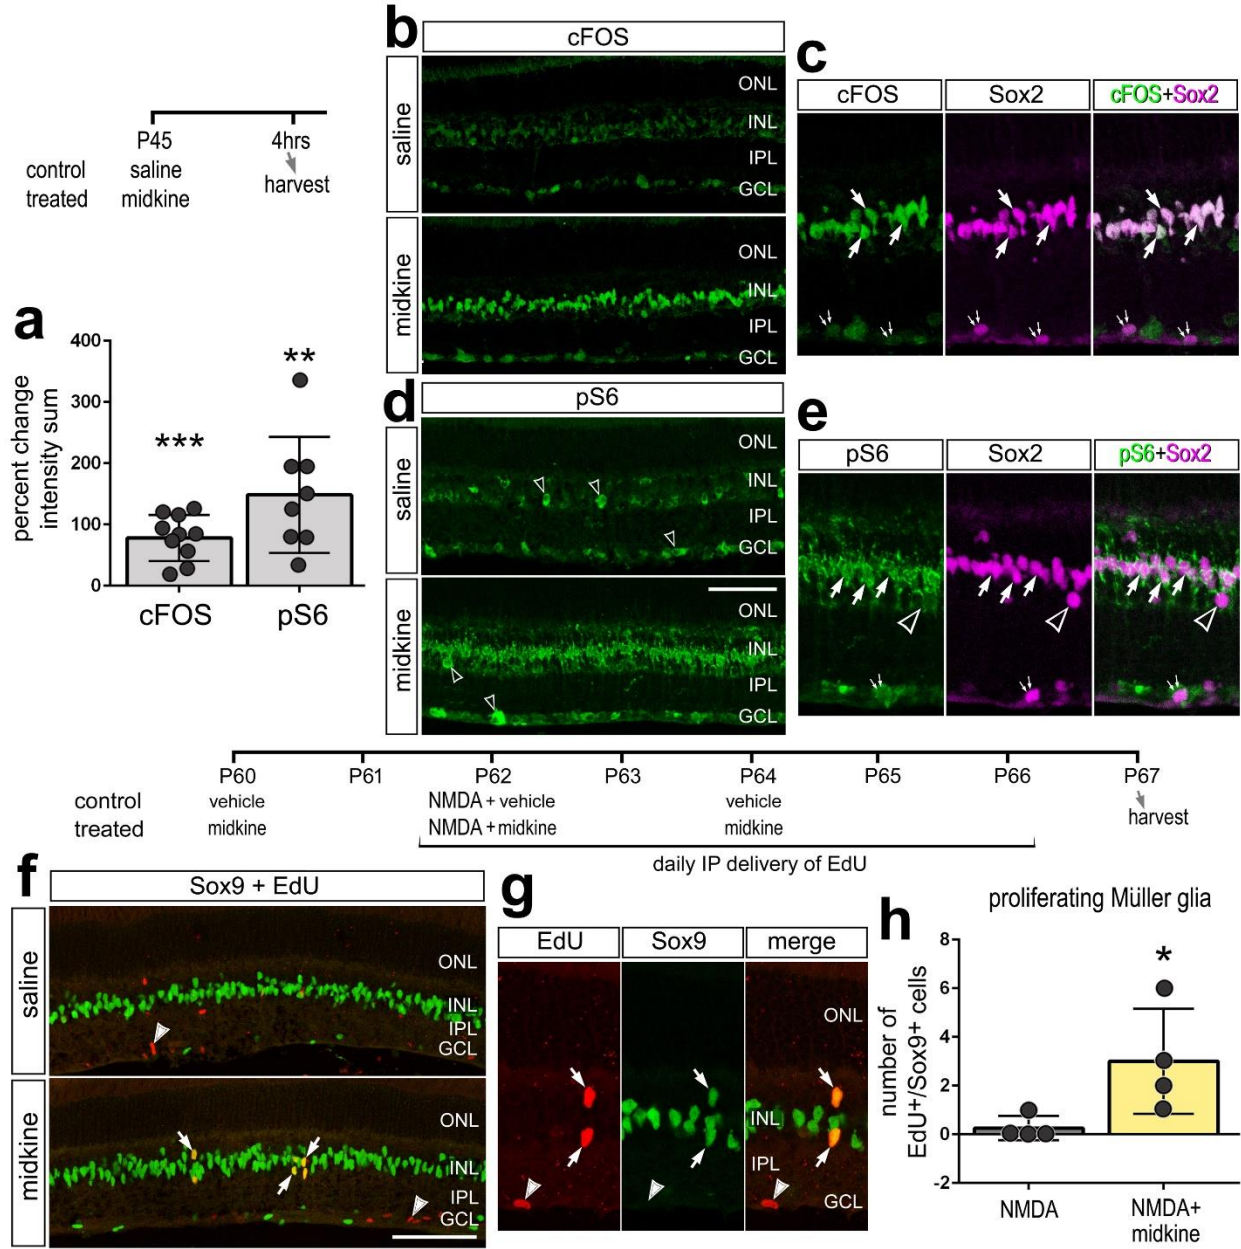

1287

1288

1289 **Figure 12.** Schematic summary of MDK-signaling in normal and NMDA-damaged  
1290 retinas. Patterns of expression, determined by scRNA-seq, are shown for Integrin  $\beta$ 1,  
1291 Integrin  $\alpha$ , PTPRZ1, PAK1 and MDK in MG, NIRG cells and inner retinal neurons.  
1292 Although GIT1, ILK, CDC42, and PP2A (*PPP2CA*) were widely expressed by nearly all  
1293 retinal cells (according to scRNA-seq data; see Fig 6a), signaling through Integrins is  
1294 shown only in MG because *ITG*'s were largely confined to MG. Putative sites of action  
1295 are shown for small-molecule inhibitors, including IPA3, calyculin A, fostriecin and  
1296  $\text{Na}_3\text{VO}_4$ . Abbreviations: PRL – photoreceptor layer, ONL – outer nuclear layer, INL –  
1297 inner nuclear layer, IPL – inner plexiform layer, GCL – ganglion cell layer, NFL – nerve  
1298 fiber layer.  
1299

1300

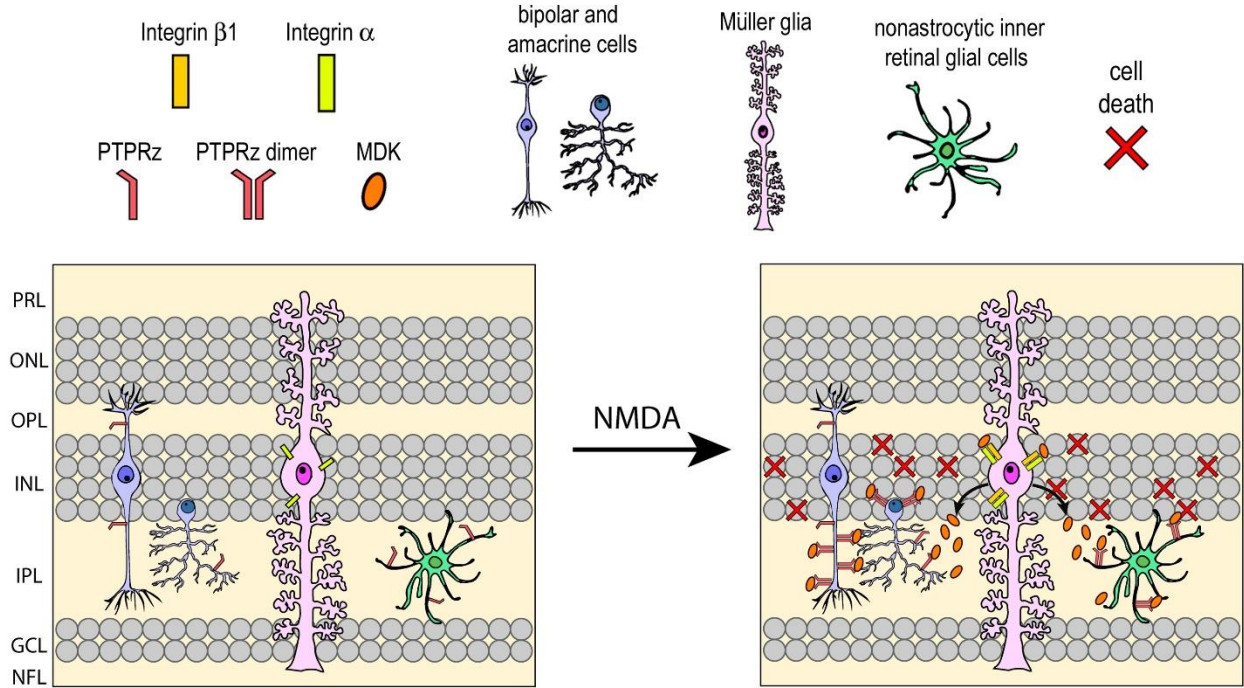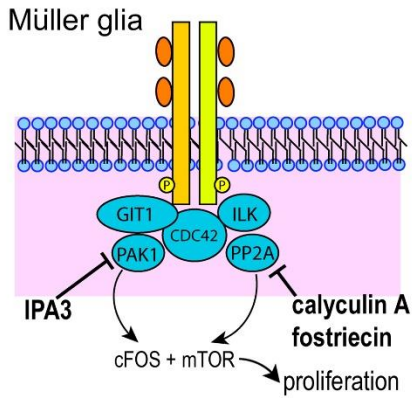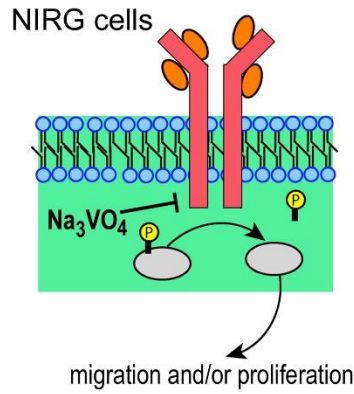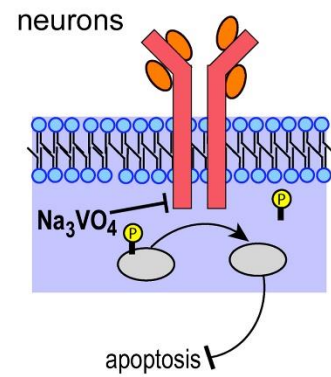

1301

1302
